# Supplementary material for: Direct hydrogen selenide (H2Se) release from activatable selenocarbamates
Source: Royal Society of Chemistry journal article supplement (doi:10.1039/d3sc01936e), 2023-01-01
Supplement: d3sc01936e1.pdf [file d3sc01936e1.pdf]

## Supporting Information

### Direct Hydrogen Selenide (H<sub>2</sub>Se) Release from Activatable Selenocarbamates

Turner D. Newton,<sup>1,#</sup> Keyan Li,<sup>1,#</sup> Jyoti Sharma,<sup>2</sup> Pier Alexandre Champagne,<sup>2</sup> and Michael D. Pluth<sup>1,\*</sup>

<sup>1</sup> Department of Chemistry and Biochemistry, Materials Science Institute, Knight Campus for Accelerating Scientific Impact, and Institute of Molecular Biology, University of Oregon, Eugene, Oregon, 97403-1253, USA.

<sup>2</sup> Department of Chemistry and Environmental Science, New Jersey Institute of Technology, Newark, New Jersey, 07103, USA.

# These authors contributed equally to this work.

\*Corresponding author

e-mail: [pluth@uoregon.edu](mailto:pluth@uoregon.edu)

## Table of Contents

|                                                                                                                        |     |
|------------------------------------------------------------------------------------------------------------------------|-----|
| 1. NMR Spectra                                                                                                         | S4  |
| 2. Full computational details                                                                                          | S14 |
| 3. Estimation of free energies of protonation of anionic species                                                       | S15 |
| 4. Transition state structures of COSe, HSe <sup>-</sup> , and H <sub>2</sub> O release from selenocarbamate tautomers | S16 |
| 5. Protonation of 3a for the release of COSe                                                                           | S17 |
| 6. Release of aniline and carbon dioxide from phenyl isocyanate                                                        | S18 |
| 7. Energy, thermochemical correction, and ωB97X-D single-point refinements of all structures                           | S20 |
| 8. XYZ coordinates for all the computed structures.                                                                    | S22 |
| 9. Mass spectra                                                                                                        | S27 |
| 10. References                                                                                                         | S30 |

## NMR Spectra

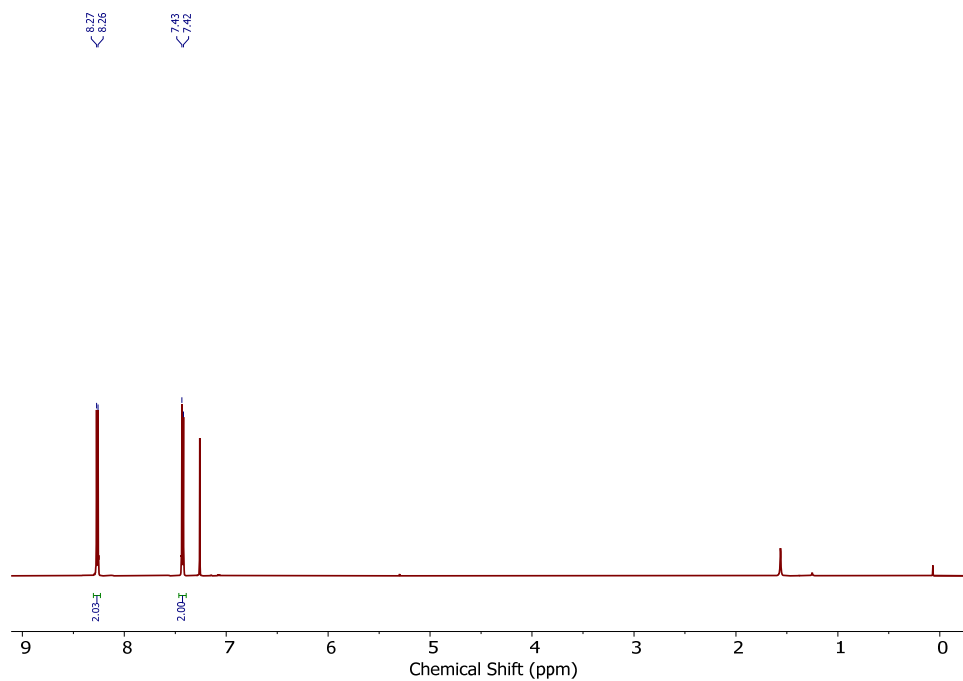

**Figure S1.** <sup>1</sup>H NMR (600 MHz, CDCl<sub>3</sub>) spectrum of 4-nitrophenyl isoselenocyanate.

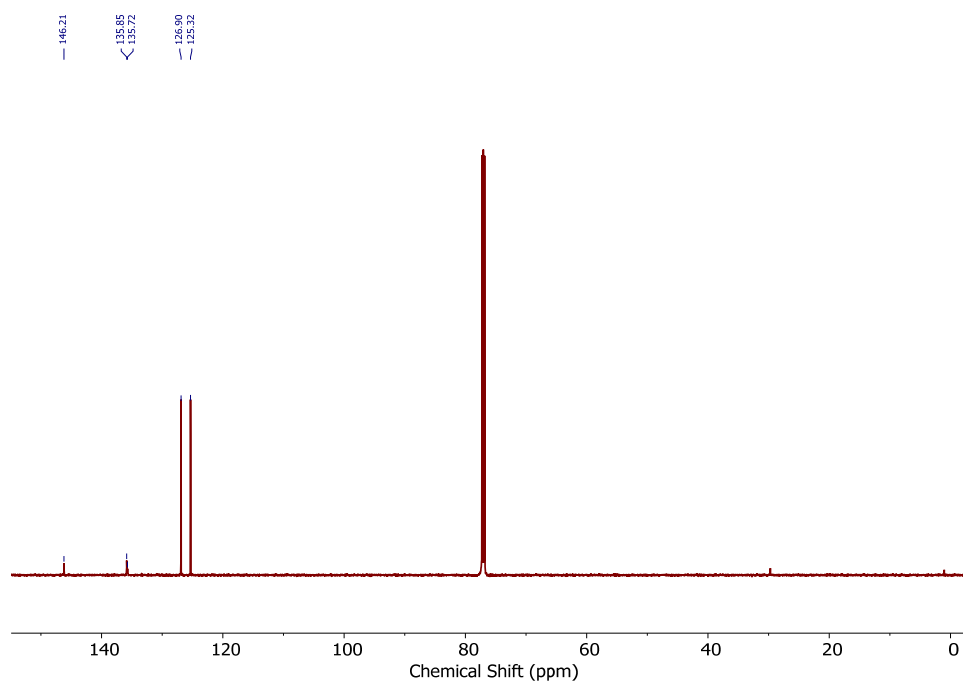

**Figure S2.** <sup>13</sup>C{<sup>1</sup>H} NMR (151 MHz, CDCl<sub>3</sub>) spectrum of 4-nitrophenyl isoselenocyanate.

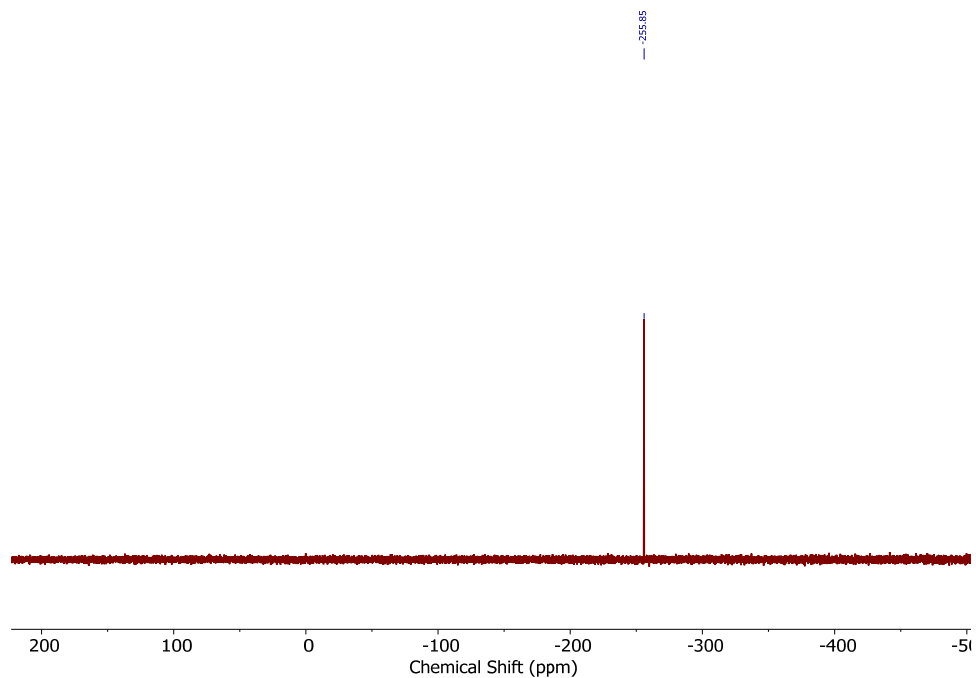

**Figure S3.**  $^{77}\text{Se}$  NMR (115 MHz,  $\text{CDCl}_3$ ) spectrum of 4-nitrophenyl isoselenocyanate.

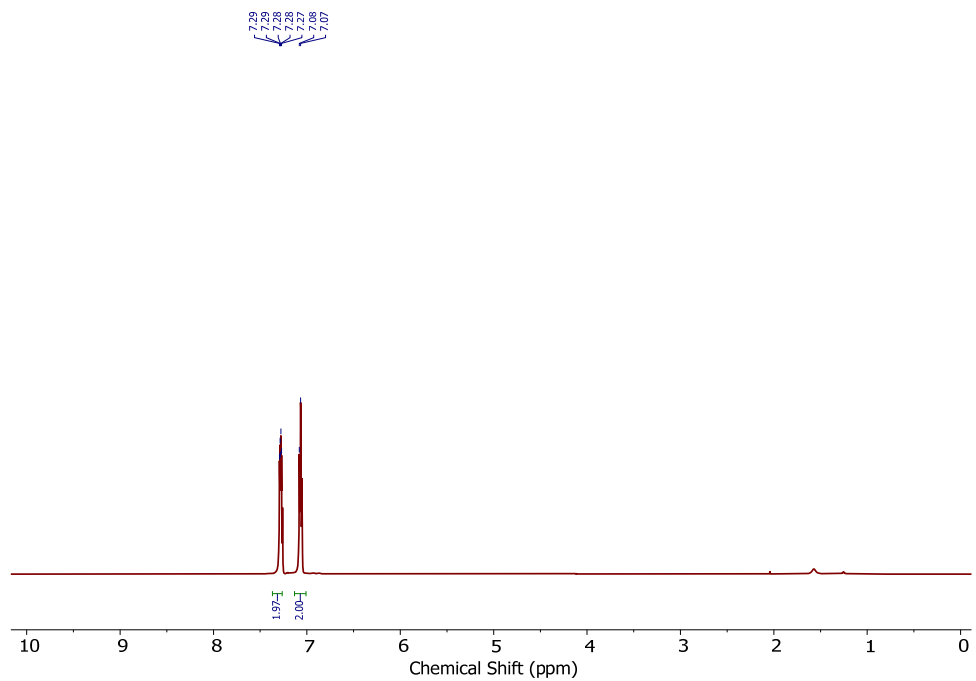

**Figure S4.**  $^1\text{H}$  NMR (600 MHz,  $\text{CDCl}_3$ ) spectrum of 4-fluorophenyl isoselenocyanate.

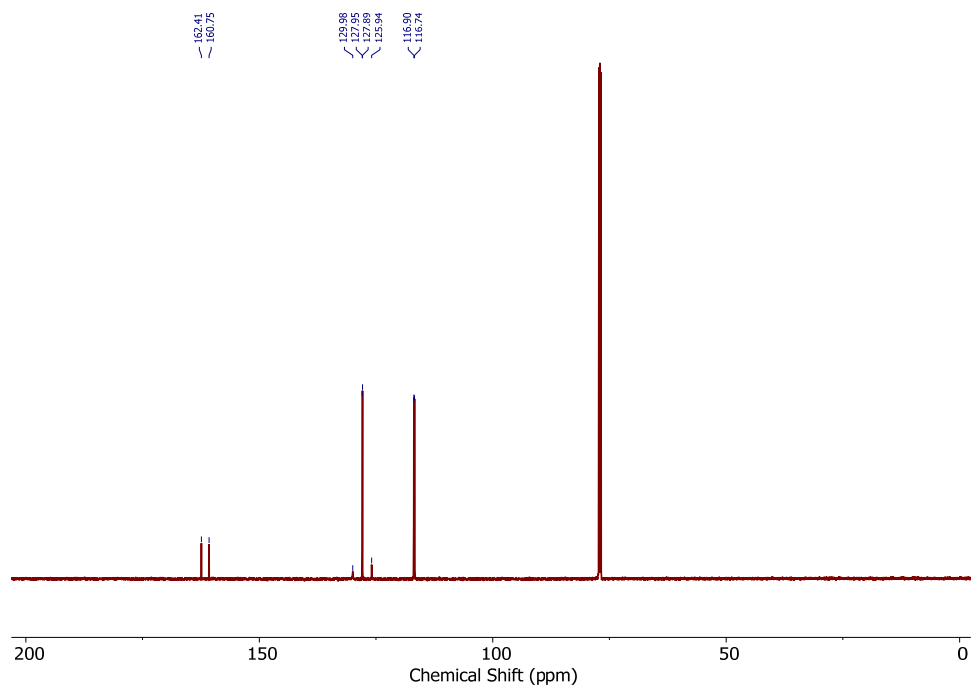

**Figure S5.**  $^{13}\text{C}\{^1\text{H}\}$  NMR (151 MHz,  $\text{CDCl}_3$ ) spectrum of 4-fluorophenyl isoselenocyanate.

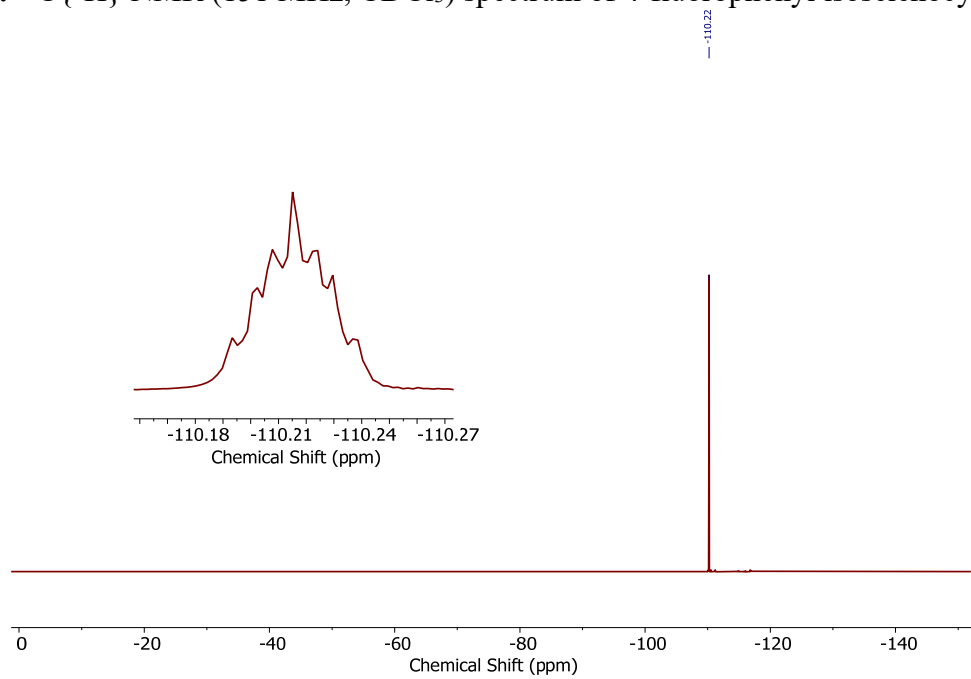

**Figure S6.**  $^{19}\text{F}$  NMR (564 MHz,  $\text{CDCl}_3$ ) spectrum of 4-fluorophenyl isoselenocyanate.

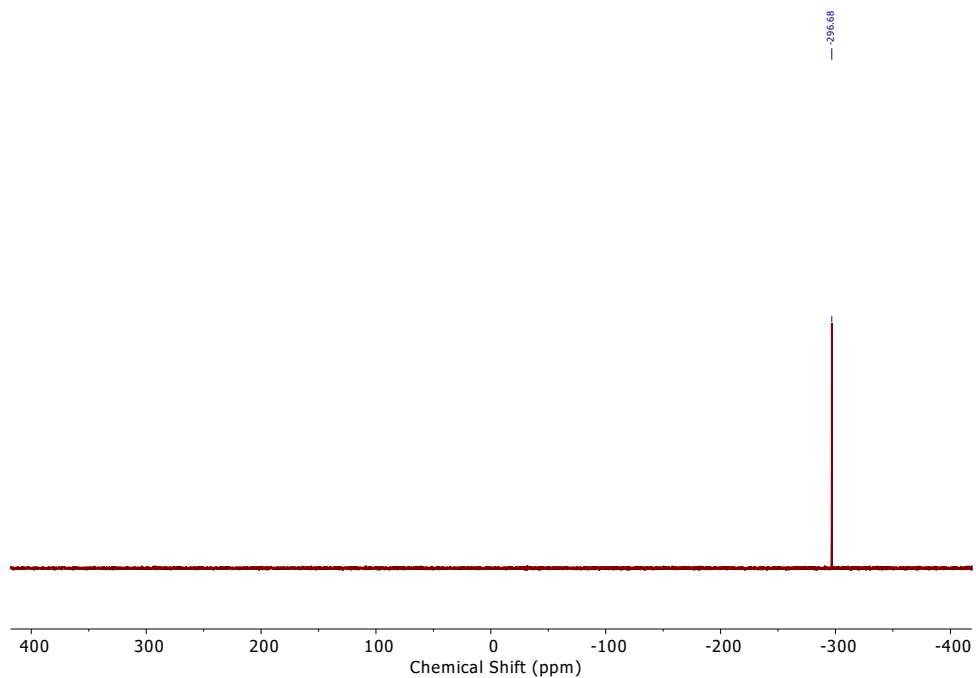

**Figure S7.**  $^{77}\text{Se}$  NMR (115 MHz,  $\text{CDCl}_3$ ) spectrum of 4-fluorophenyl isoselenocyanate.

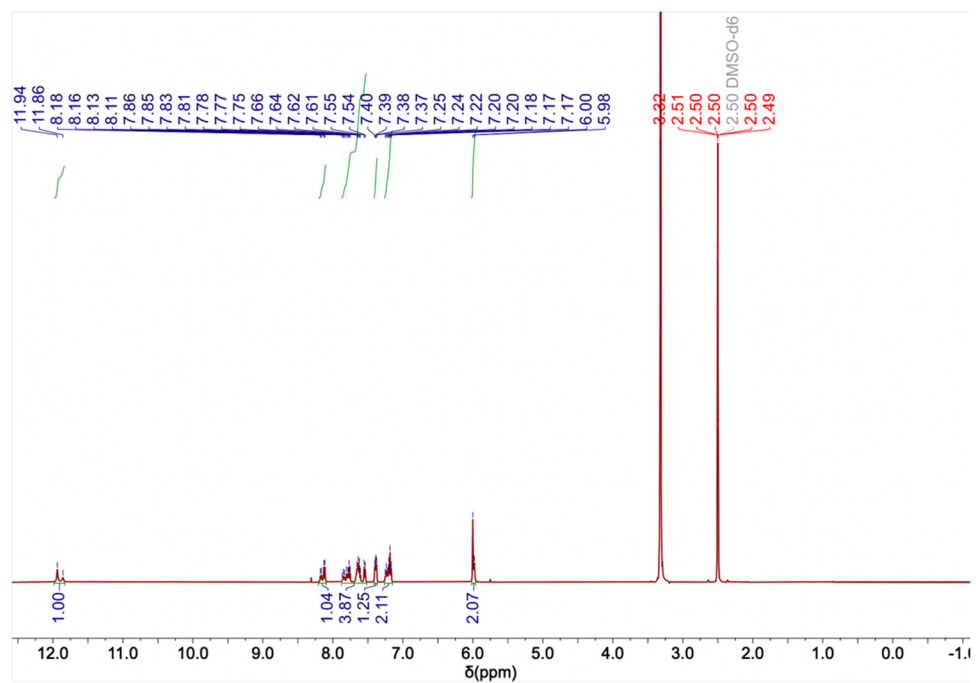

**Figure S8.**  $^1\text{H}$  NMR (600 MHz,  $\text{DMSO-d}_6$ ) spectrum of PhotoSeCM.

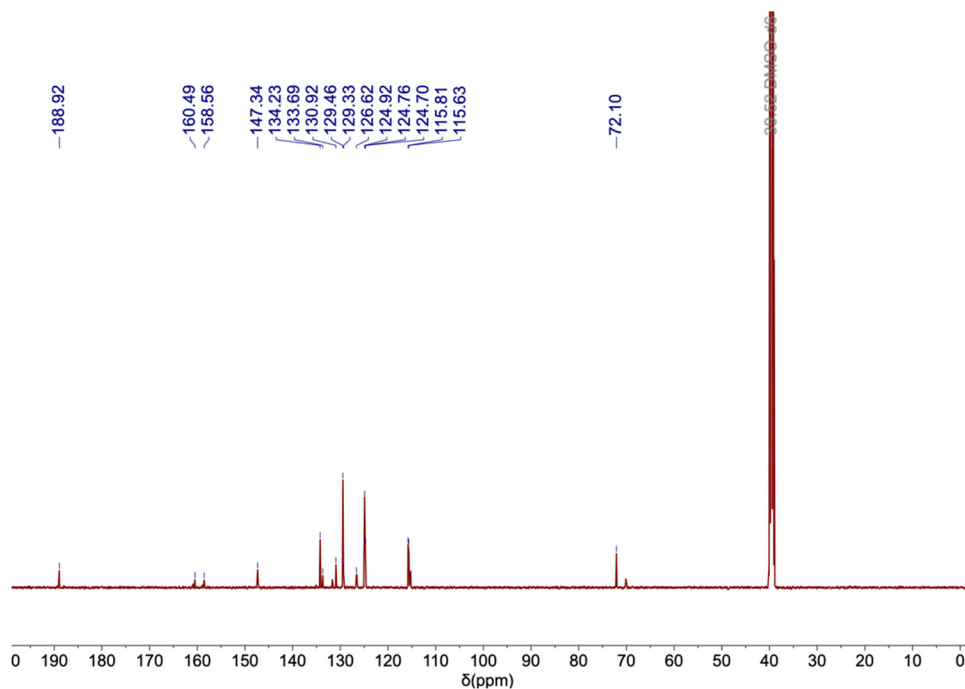

**Figure S9.**  $^{13}\text{C}\{^1\text{H}\}$  NMR (151 MHz, DMSO- $d_6$ ) spectrum of PhotoSeCM.

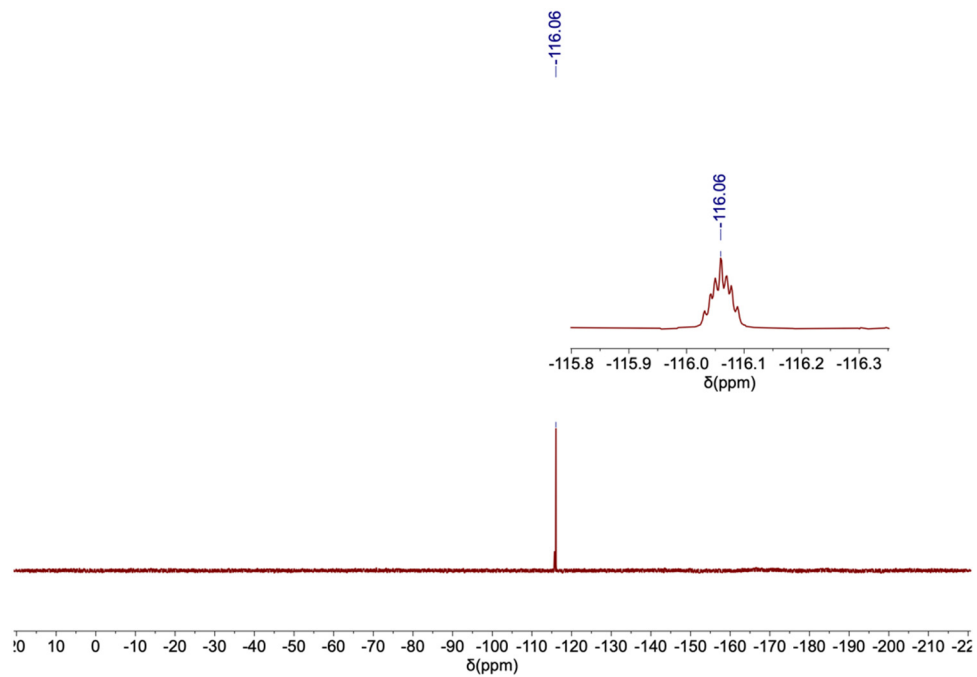

**Figure S10.**  $^{19}\text{F}$  NMR (564 MHz, DMSO- $d_6$ ) spectrum of PhotoSeCM.

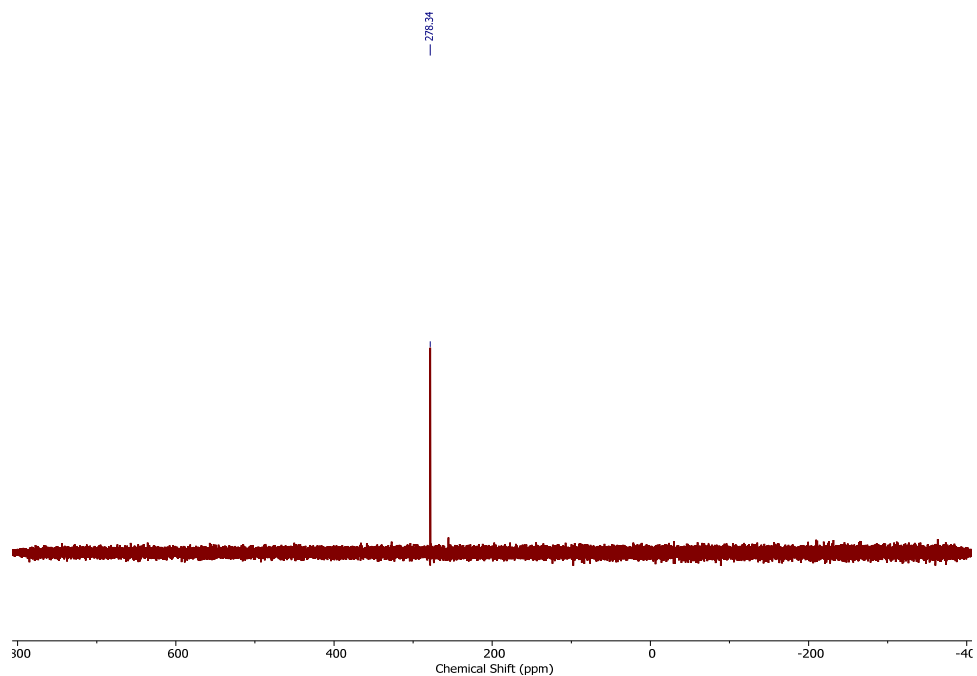

**Figure S11.**  $^{77}\text{Se}$  NMR (115 MHz, DMSO- $d_6$ ) spectrum of PhotoSeCM.

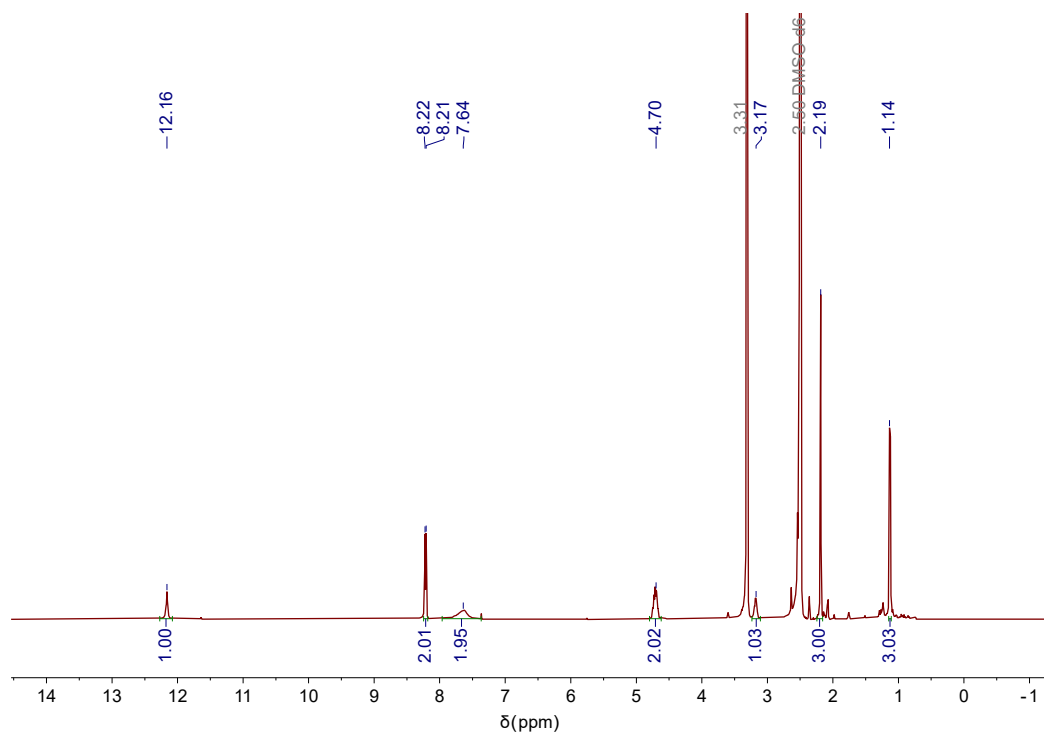

**Figure S12.**  $^1\text{H}$  NMR (600 MHz, DMSO- $d_6$ ) spectrum of PNA-MeGKSeCM.



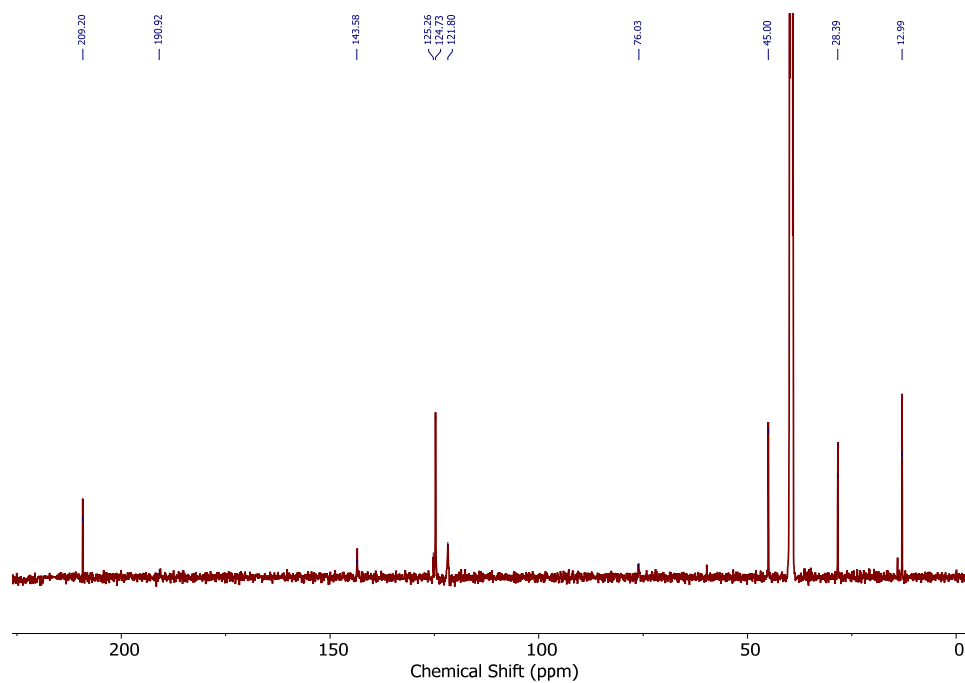

**Figure S13.**  $^{13}\text{C}\{^1\text{H}\}$  NMR (151 MHz, DMSO- $d_6$ ) spectrum of PNA-MeGKSeCM.

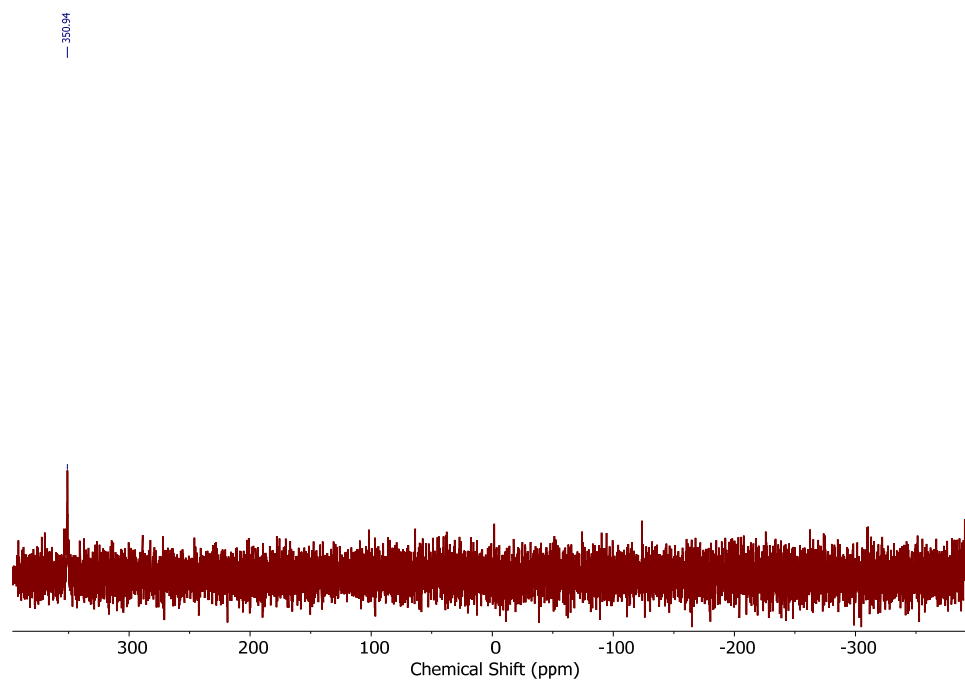

**Figure S14.**  $^{77}\text{Se}$  NMR (115 MHz, DMSO- $d_6$ ) spectrum of PNA-MeGKSeCM.

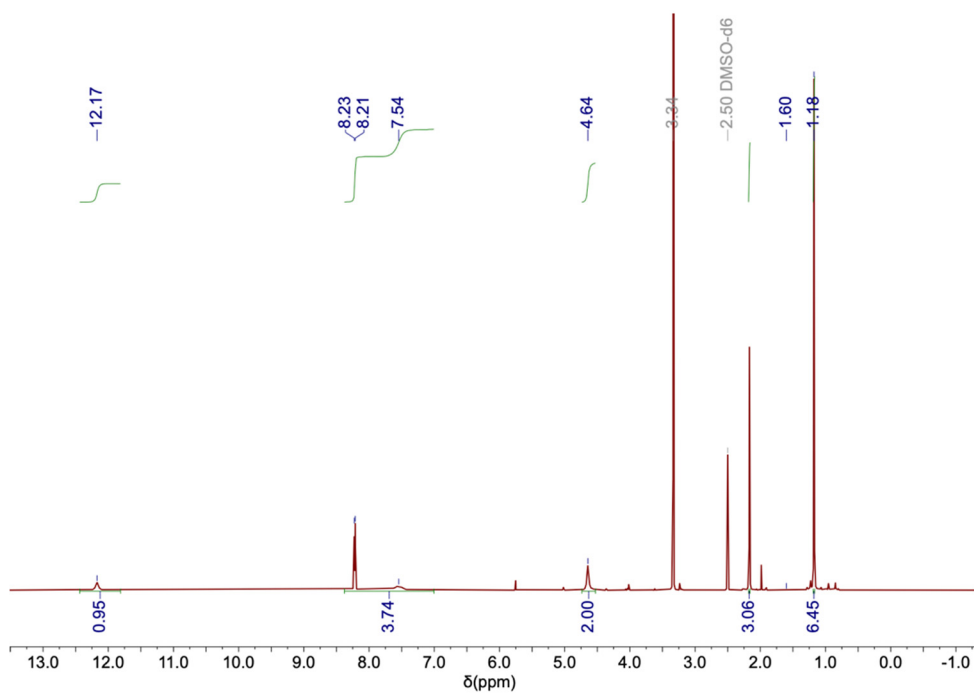

**Figure S15.**  $^1\text{H}$  NMR (600 MHz, DMSO-d<sub>6</sub>) spectrum of PNA-Me<sub>2</sub>GKSeCM.

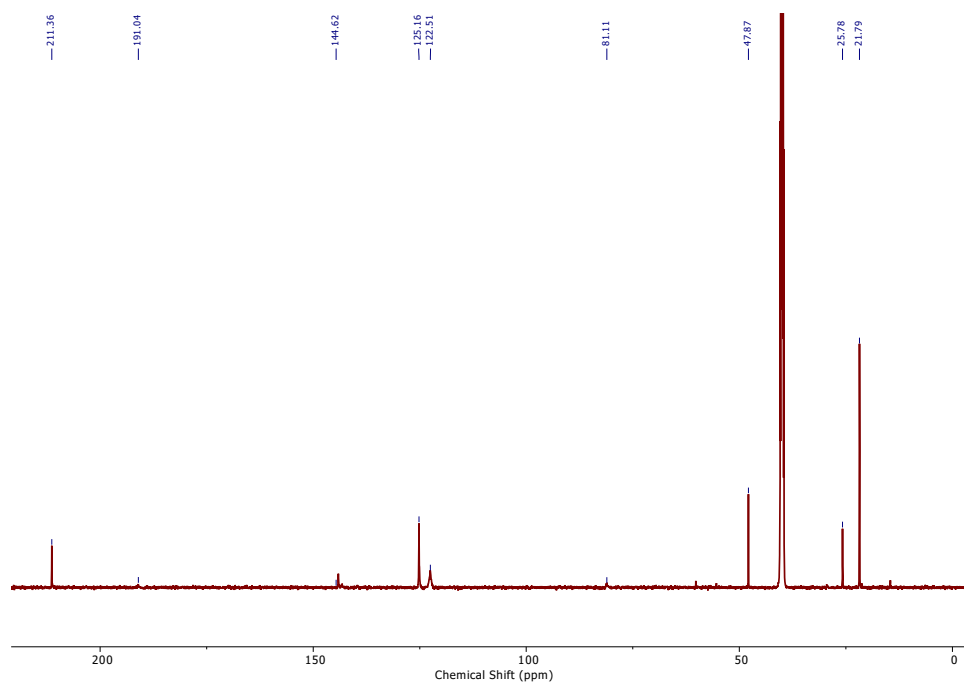

**Figure S16.**  $^{13}\text{C}\{^1\text{H}\}$  NMR (151 MHz, DMSO-d<sub>6</sub>) spectrum of PNA-Me<sub>2</sub>GKSeCM.

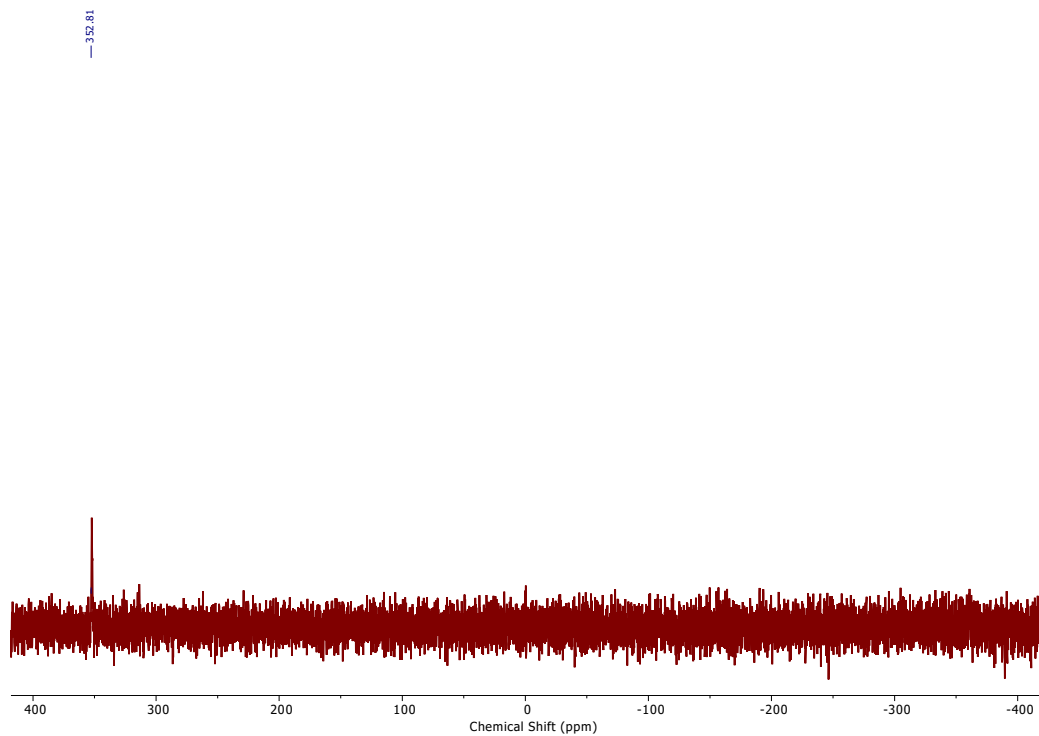

**Figure S17.**  $^{77}\text{Se}$  NMR (115 MHz,  $\text{DMSO-d}_6$ ) spectrum of PNA- $\text{Me}_2\text{GKSeCM}$ .

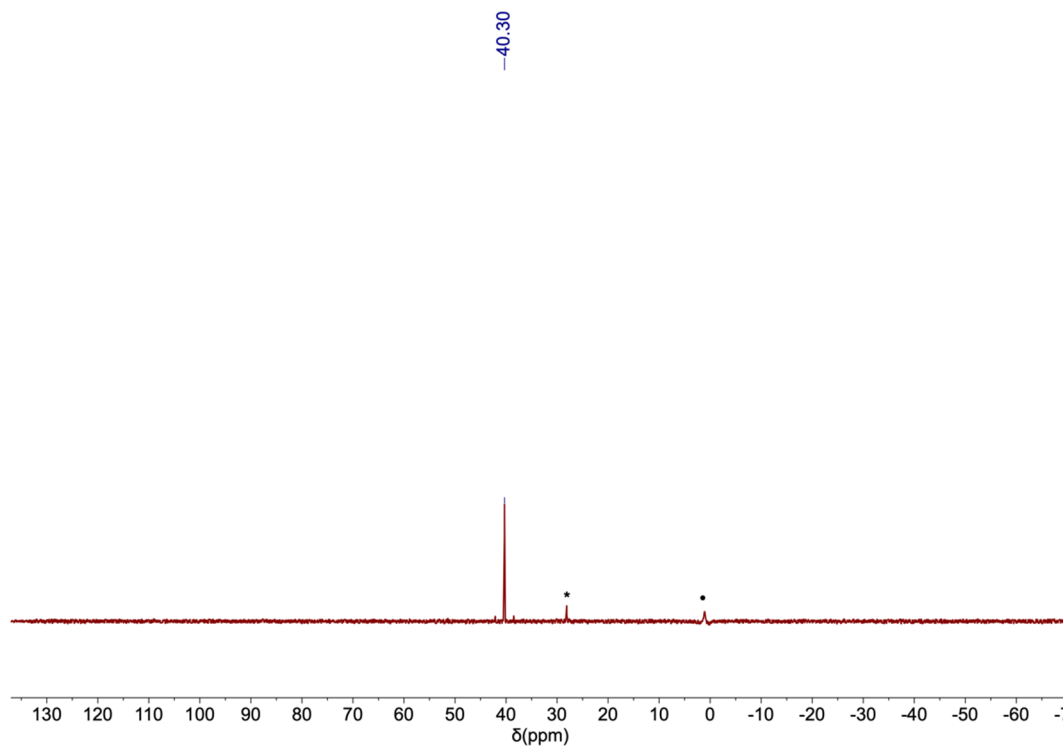

**Figure S18.**  $^{31}\text{P}$  NMR (242 MHz,  $\text{MeCN-d}_3$ ) spectrum of  $\text{H}_2\text{Se}$  trapping mixture after treatment with  $\text{PPh}_3$ , showing  $\text{Se}=\text{PPh}_3$  formation. “\*” denotes trace  $\text{O}=\text{PPh}_3$  byproduct and “•” denotes residual  $\text{PPh}_3$ .

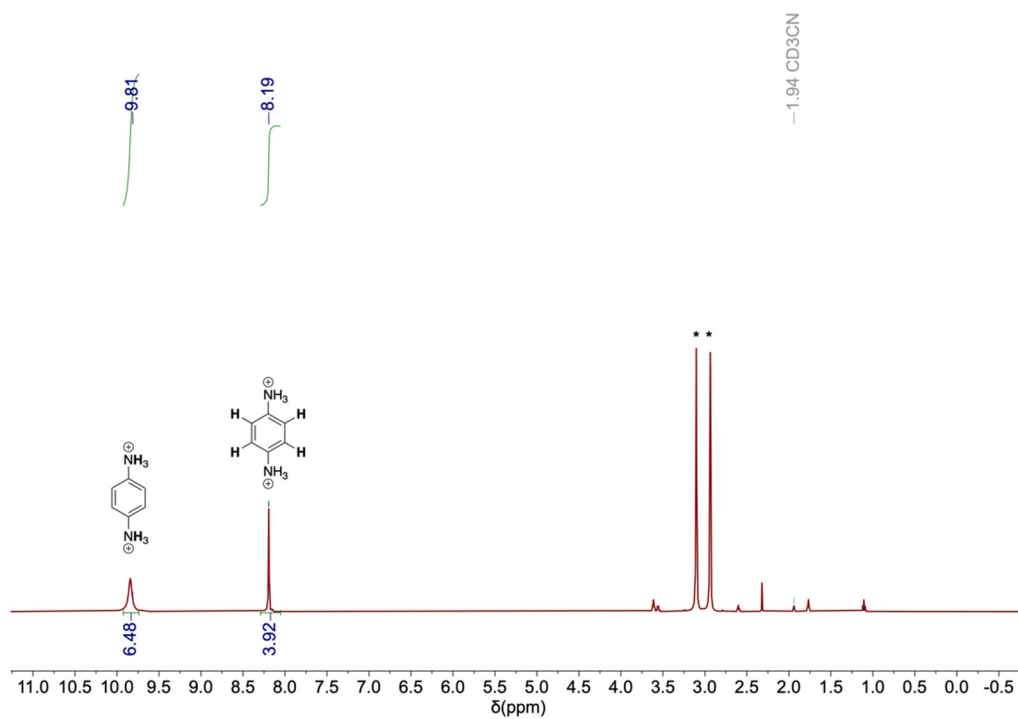

**Figure S19.**  $^1\text{H}$  NMR (500 MHz,  $\text{MeCN-d}_3$ ) spectrum of  $\text{H}_2\text{Se}$  trapping mixture. “\*” denotes DMF.

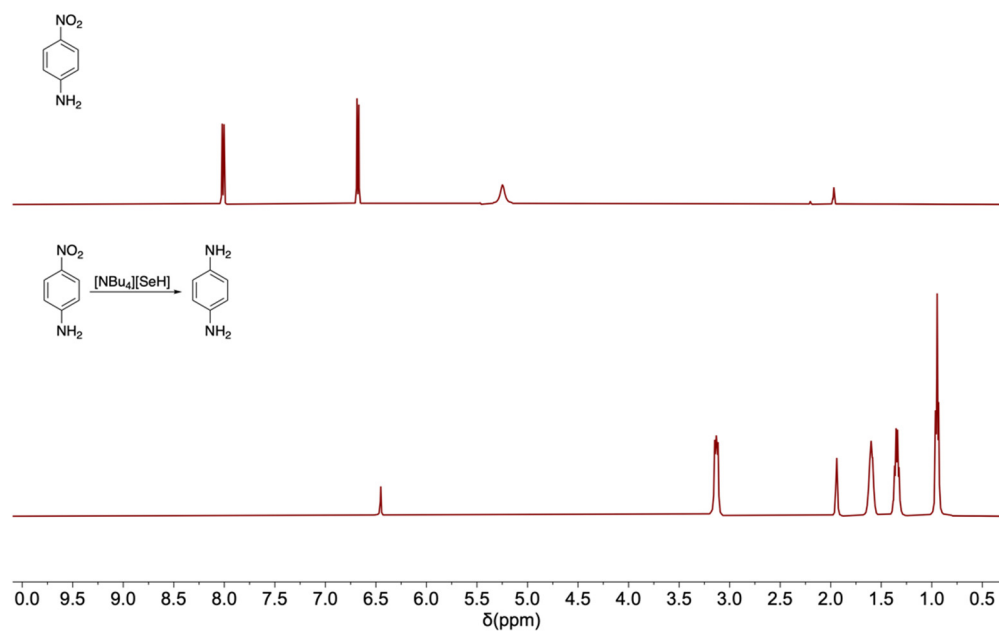

**Figure S20.**  $^1\text{H}$  NMR (500 MHz,  $\text{MeCN-d}_3$ ) spectra of *p*-nitroaniline standard (top) and *p*-nitroaniline treated with  $[\text{NBu}_4][\text{SeH}]$  to produce *p*-phenylenediamine (bottom).

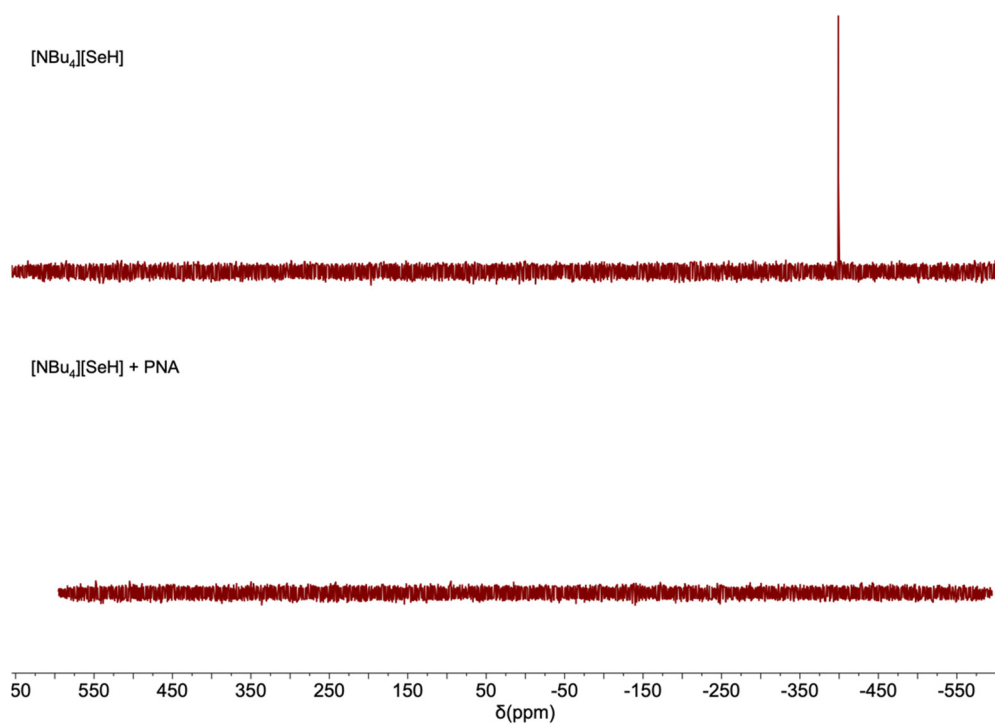

**Figure S21.**  $^{77}\text{Se}$  NMR (115 MHz,  $\text{MeCN-d}_3$ ) spectra of  $[\text{NBu}_4][\text{SeH}]$  (top) and  $[\text{NBu}_4][\text{SeH}]$  treated with *p*-nitroaniline (bottom).

### **Full computational details**

Gaussian 16 was used to perform Density Functional Theory (DFT) calculations,<sup>1</sup> where geometry optimizations were conducted with the  $\omega$ B97X-D<sup>2</sup> method using the aug-cc-pVDZ basis set.<sup>3</sup> Following this, single-point energy refinements were performed using the  $\omega$ B97X-D functional and the aug-cc-pV(T+d)Z basis set. The SMD implicit solvation model for water was used at all stages to consider solvation effects.<sup>4</sup> By default, Gaussian 16 request an "ultrafine" pruned (99,590) grid for numerical integrations, eliminating most orientation-specific issues.<sup>5</sup> Frequency calculations were performed at the optimization level to confirm stationary points as minima or first-order saddle points and obtain corrections for zero-point energy, enthalpy, and free energy at a standard state of 1 atm pressure and 298 K temperature using Goodvibes v2.0.3.<sup>6</sup> Grimme's scheme for the treatment of small frequencies was applied, setting frequencies below  $100\text{ cm}^{-1}$  to  $100\text{ cm}^{-1}$ .<sup>7</sup> The final free energies were computed by adding the free energy corrections obtained from the frequency analysis to the single-point electronic energies. CYLview was used to prepare visualizations of the computed structures.<sup>8</sup>

### Estimation of free energies of protonation of anionic species

The free energy of protonation of the anionic species was evaluated using two methods. In the first method, the free energy of reaction for using water and forming hydroxide was evaluated using the energies of the isolated species. For species that have a known  $pK_a$  in water, the free energy of deprotonation was computed from the pH of the solution using the following relationship:<sup>9</sup>

$$\Delta G_{deprot} = -RT \ln(10^{(pH-pK_a)}) = RT (pK_a - pH) \ln(10)$$

For phenylcarbamic acid (PhNCO<sub>2</sub>H), which has a known  $pK_a$  of 4.62, we compute that the free energy of protonation of **4b** at pH 8 and 298.15 K is 4.6 kcal/mol, which is the value shown in Figure 8 for the transformation of **4b** to **5a**. For the same transformation, using an isolated water and forming an isolated hydroxide in DFT calculations, a value of 26.4 kcal/mol is obtained. This large difference can be caused by the fact that this hypothetical reaction does not consider explicit solvation of water and hydroxide, and that it represents the maximum basicity of one hydroxide molecule without hydrogen bonding.

For *p*-nitrophenylcarbamic acid that has a  $pK_a$  of 1.2, at pH 8 the protonation of the carbamate has a reaction free energy of 9.3 kcal/mol.

The difference between the  $pK_a$ - and DFT-computed values for protonation of **4b** (21.7 kcal/mol) allow us to crudely estimate the  $pK_a$  of species for which no data in water exists. For instance, for anilide protonation with an isolated water has a reaction energy of -5.1 kcal/mol (shown in Figure 8). By comparison with the phenylcarbamic acid, this free energy difference at pH 8 should be -26.8, giving a  $pK_a$  of anilide at 27.7, in line with its  $pK_a$  in DMSO (30.6). Due to the obvious limitations of this method considering the approximations, we prefer to use the DFT-computed value in Figure 8.

## Transition state structures of COSe, HSe<sup>-</sup>, and H<sub>2</sub>O release from selenocarbamate tautomers

The potential energy diagrams for path 1 and path 2 are presented in the main text. Path 2, in the presence of an explicit water molecule (TS1'), is higher in free energy than TS1 by 0.8 kcal/mol and as such presents no free energy benefit.

### Path 1

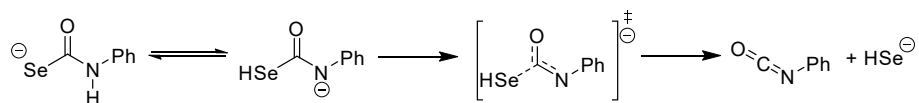

### Path 2

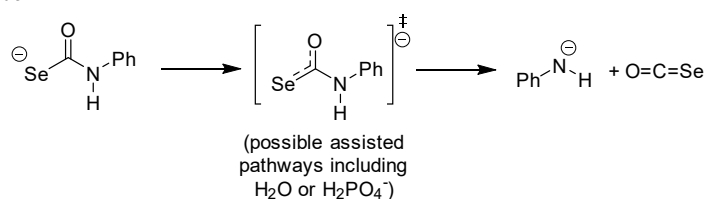

### Path 3

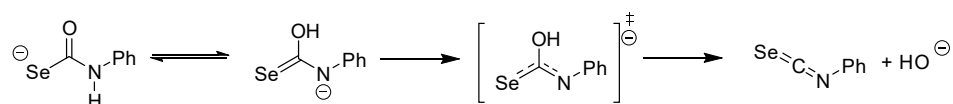

**Scheme S1.** Competing pathways for H<sub>2</sub>Se, COSe and H<sub>2</sub>O release.

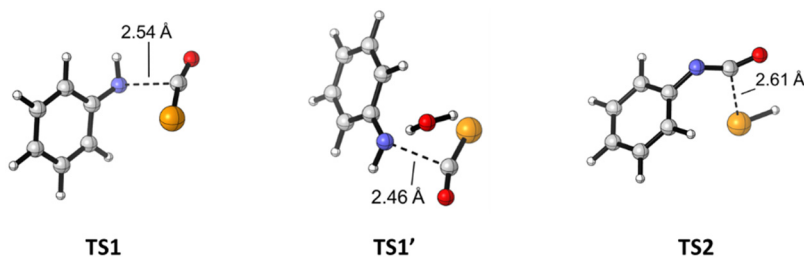

**Figure S22.** TSs for selenocarbamate **3** associated with paths 1 and 2.

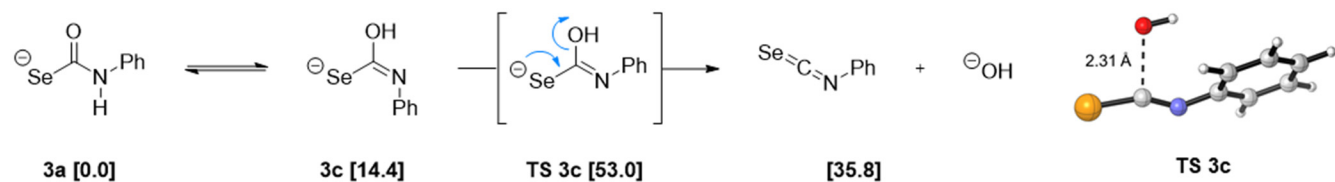

**Figure S13.** Potential energy surface (PES) for path 3



## Protonation of **3a** for the release of COSe

The protonation of **3a** to form **3a·H** was studied using an isolated water molecule (**Figure S24**). For the most stable protonation to **3a·H (SeH)**, the reaction energy is 29.4 kcal/mol, which amounts to 7.7 kcal/mol at pH 8 if estimated based on the difference found for phenylcarbamic acid (see above). This energy difference gives an estimated  $pK_a$  of 2.4 for **3a**, less basic than dithiocarbamates.<sup>10</sup> For a *p*-nitroselenocarbamate, this  $pK_a$  would go down to -1.0, by comparison to the carbamate. The zwitterionic **3a·H (NH<sub>2</sub>)** is 11.9 kcal/mol higher in free energy than **3a·H (SeH)**, and so sits at 19.6 kcal/mol (assuming the pH 8 correction). The TS for elimination of COSe and aniline is then 2.4 kcal/mol higher in free energy.

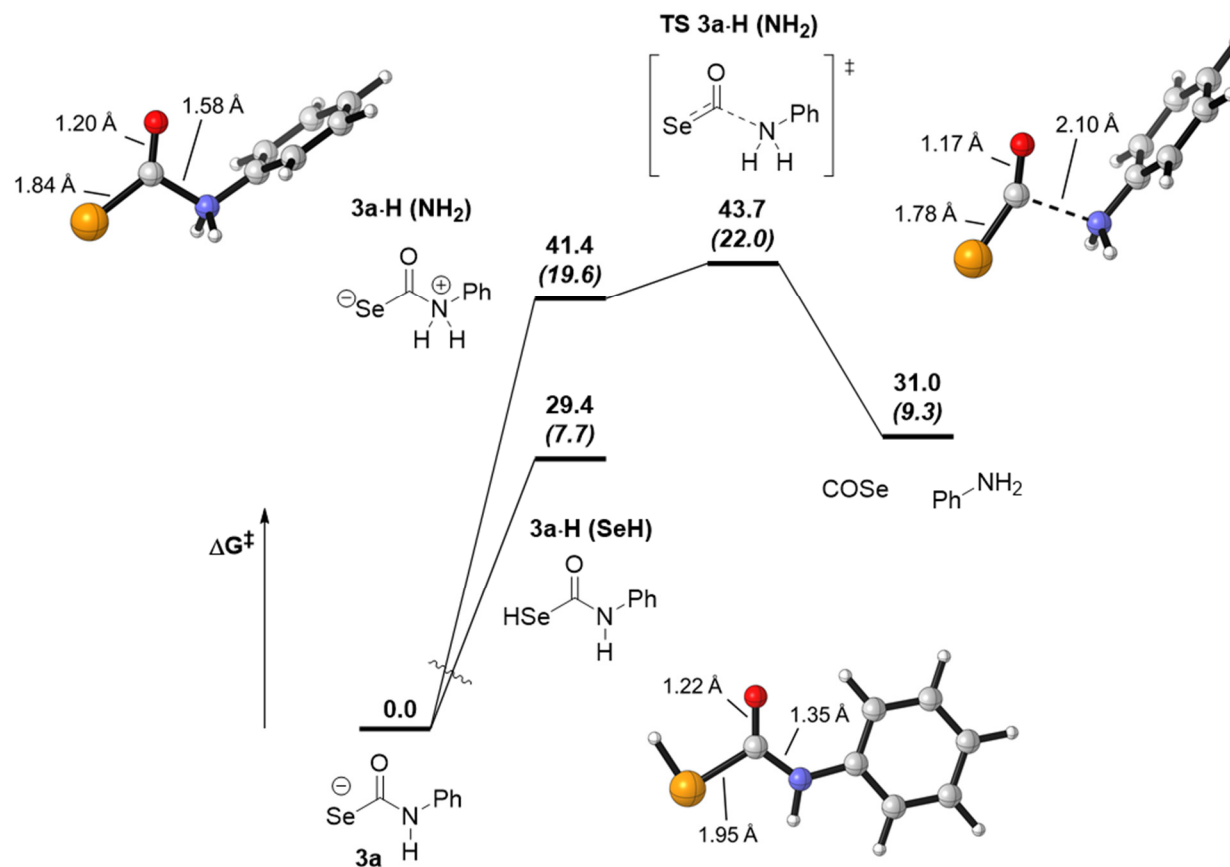

**Figure S24.** Protonation of **3a** and subsequent elimination of COSe and aniline. Free energies (in kcal/mol) represent the protonation from water forming hydroxide (top value), and the estimated value at pH 8 considering the free energy difference found for phenylcarbamic acid (italics, see above).

## Release of Aniline and carbon dioxide from phenyl isocyanate.

We have designed several reaction pathways to investigate the ultimate product synthesis of aniline and carbon dioxide, as presented in Scheme S1. The associated activation and reaction energies are depicted in Table S7. According to our computational analysis, the lowest energy barrier associated with the hydroxy anion ( $\text{OH}^-$ ) attacking phenylisocyanate is 11.0 (TS3) The resulting product **4a** generates a  $\text{CO}_2$  by tautomerization to **4b**, ultimately leading to cleavage and formation of the anilide anion and  $\text{CO}_2$  via two potential transition states, namely **TS4** and **TS4'** (in the presence of explicit water). Our calculations show that **TS4** exhibits a lower activation barrier compared to **TS4'** because of the presence of a water molecule that causes entropy loss. A more reasonable pathway for the generation of aniline and  $\text{CO}_2$  is from **5b** via **TS5**. As shown in the main text, this pathway has a lower free energy requirement, especially if the protonation free energy for **4b** is computed for pH 8 using the experimental  $\text{pK}_a$ .

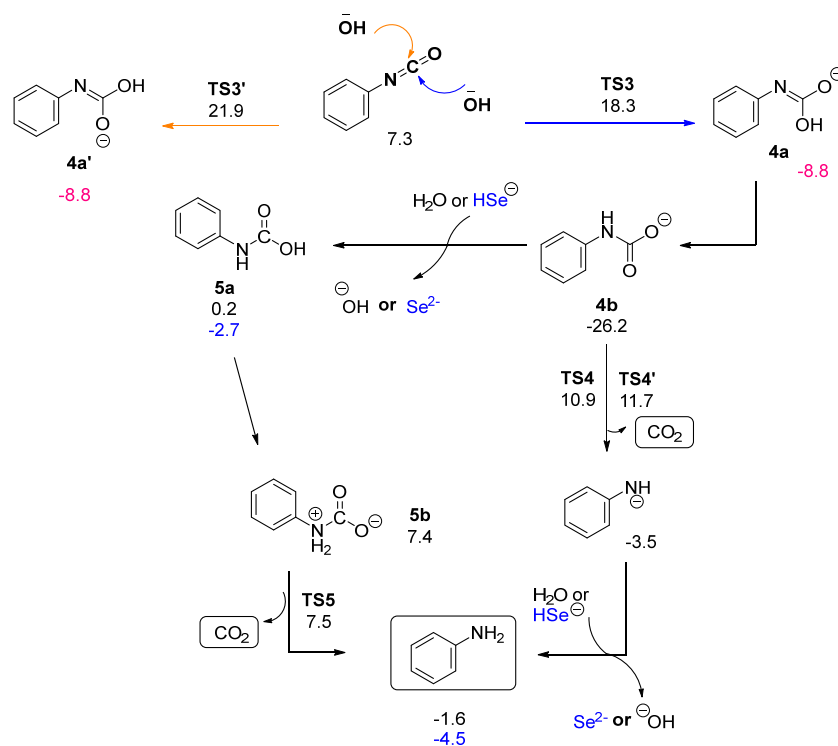

**Scheme S2.** Possible routes for elimination of aniline and carbon dioxide. All free energies are presented relative to **3a** (0.0 kcal/mol).

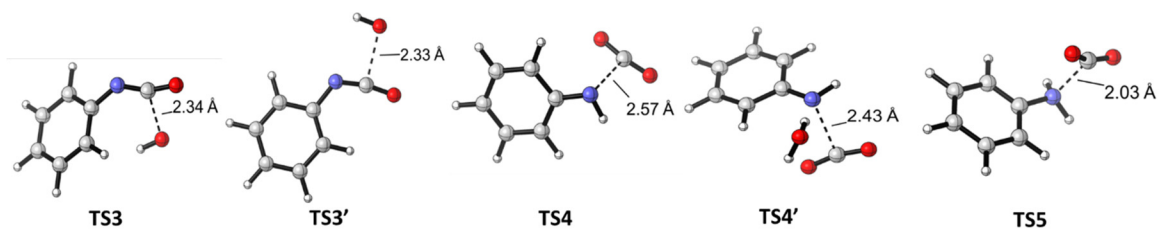

**Figure S25.** TSs for formation of aniline and carbon dioxide from phenylisocyanate.

### Energy, thermochemical correction, and $\omega$ B97X-D single-point refinements of all structures.

All thermochemical corrections were obtained using the optimization level of theory ( $\omega$ B97X-D/aug-cc-pVDZ/SMD(H<sub>2</sub>O)) at the standard state of 1 atm and 298.15 K, using Grimme's quasiharmonic corrections. Single-point energy refinements were obtained at the  $\omega$ B97X-D/aug-cc-pV(T+d)Z/SMD(H<sub>2</sub>O) level of theory.

**Table S1.** Energies (E), enthalpies (H), quasi-harmonic-corrected free energies (G), and single-point energies (SPE) of ground state structures (in hartrees).

| Structure        | E            | H            | G            | $\omega$ B97X-D SPE |
|------------------|--------------|--------------|--------------|---------------------|
| CO <sub>2</sub>  | -188.546602  | -188.531463  | -188.555723  | -188.593854         |
| COSe             | -2514.89787  | -2514.885722 | -2514.91346  | -2514.998045        |
| H <sub>2</sub> O | -76.431113   | -76.405966   | -76.427396   | -76.451362          |
| HSe anion        | -2402.336637 | -2402.327787 | -2402.3504   | -2402.408145        |
| <b>4a</b>        | -475.62769   | -475.499254  | -475.541304  | -475.733479         |
| <b>4b</b>        | -475.652788  | -475.52362   | -475.565807  | -475.759062         |
| PhNCO            | -399.640514  | -399.528349  | -399.568091  | -399.731905         |
| PhNCSe           | -2725.997707 | -2725.887861 | -2725.930744 | -2726.143671        |
| anilide anion    | -287.03412   | -286.923955  | -286.959143  | -287.096895         |
| hydroxide        | -75.933259   | -75.92112    | -75.940672   | -75.951852          |
| Se dianion       | -2401.851633 | -2401.849272 | -2401.867826 | -2401.921936        |
| Aniline          | -287.550379  | -287.426114  | -287.461889  | -287.60687          |
| <b>5a</b>        | -476.109994  | -475.967169  | -476.009425  | -476.219023         |
| <b>5b</b>        | -476.098169  | -475.955331  | -475.998049  | -476.207155         |

**Table S2.** Energies (E), enthalpies (H), quasi-harmonic-corrected free energies (G), and single-point energies (SPE) of ground state selenocarbamate tautomers and protonated selenocarbamic acids (in hartrees)

| Structure                    | E            | H            | G            | $\omega$ B97X-D SPE |
|------------------------------|--------------|--------------|--------------|---------------------|
| <b>3a</b>                    | -2802.01661  | -2801.88896  | -2801.933372 | -2802.176284        |
| <b>3b</b>                    | -2801.9824   | -2801.860318 | -2801.90598  | -2802.141503        |
| <b>3c</b>                    | -2801.993725 | -2801.866674 | -2801.911302 | -2802.152839        |
| <b>3a·H (NH<sub>2</sub>)</b> | -2802.449046 | -2802.308503 | -2802.353868 | -2802.610748        |
| <b>3a·H (SeH)</b>            | -2802.462951 | -2802.326296 | -2802.37214  | -2802.625342        |

**Table S3.** Energies (E), enthalpies (H), quasi-harmonic-corrected free energies (G), and single-point energies (SPE) of transition states from selenocarbamate tautomers and protonated forms (in hartrees).

| <b>Structure</b>                | <b>E</b>     | <b>H</b>     | <b>G</b>     | <b>ωB97X-D SPE</b> |
|---------------------------------|--------------|--------------|--------------|--------------------|
| <b>TS-1</b>                     | -2801.932923 | -2801.810191 | -2801.856201 | -2802.094787       |
| <b>TS-2</b>                     | -2801.971713 | -2801.850984 | -2801.896926 | -2802.132687       |
| <b>TS 3c</b>                    | -2801.923198 | -2801.800754 | -2801.84721  | -2802.084566       |
| <b>TS 3a·H (NH<sub>2</sub>)</b> | -2802.439642 | -2802.302    | -2802.347971 | -2802.60338        |

**Table S4.** Energies (E), enthalpies (H), quasi-harmonic-corrected free energies (G), and single-point energies (SPE) of transition state structures involve in aniline and carbon dioxide formation (in hartrees).

| <b>Structure</b> | <b>E</b>    | <b>H</b>    | <b>G</b>    | <b>ωB97X-D SPE</b> |
|------------------|-------------|-------------|-------------|--------------------|
| TS3              | -475.573896 | -475.448979 | -475.492655 | -475.682445        |
| TS3'             | -475.567214 | -475.442539 | -475.487092 | -475.675612        |
| TS4              | -475.58492  | -475.459385 | -475.503414 | -475.694604        |
| TS4'             | -552.032775 | -551.880527 | -551.930483 | -552.16165         |
| TS5              | -476.092429 | -475.952107 | -475.995693 | -476.203636        |

## XYZ coordinates for all the computed structures.

All structures were optimized at the  $\omega$ B97X-D/aug-cc-pVDZ/SMD(H<sub>2</sub>O) level of theory.

Imaginary frequencies are provided for all transition structures.

### Ground states structures

#### CO<sub>2</sub>

|   |          |          |           |
|---|----------|----------|-----------|
| C | 0.000000 | 0.000000 | 0.000000  |
| O | 0.000000 | 0.000000 | 1.162953  |
| O | 0.000000 | 0.000000 | -1.162953 |

#### COSe

|    |          |          |           |
|----|----------|----------|-----------|
| C  | 0.000000 | 0.000000 | -1.020765 |
| O  | 0.000000 | 0.000000 | -2.178358 |
| Se | 0.000000 | 0.000000 | 0.692690  |

#### H<sub>2</sub>O

|   |           |           |           |
|---|-----------|-----------|-----------|
| H | -0.000000 | -0.759193 | -0.474324 |
| O | 0.000000  | 0.000000  | 0.118581  |
| H | 0.000000  | 0.759193  | -0.474324 |

#### HSe anion

|    |          |          |           |
|----|----------|----------|-----------|
| Se | 0.000000 | 0.000000 | 0.042123  |
| H  | 0.000000 | 0.000000 | -1.432196 |

#### PhNCO

|   |           |           |           |
|---|-----------|-----------|-----------|
| C | 1.637275  | 1.386013  | 0.000048  |
| C | 0.284600  | 1.054395  | 0.000173  |
| C | -0.091432 | -0.292569 | 0.000153  |
| C | 0.873870  | -1.300120 | -0.000113 |
| C | 2.224871  | -0.955132 | -0.000193 |
| C | 2.611326  | 0.385399  | -0.000162 |
| H | 1.930198  | 2.435855  | 0.000094  |
| H | -0.478132 | 1.833207  | 0.000272  |
| H | 0.563462  | -2.344154 | -0.000158 |
| H | 2.978489  | -1.742558 | -0.000351 |
| H | 3.668172  | 0.650982  | -0.000209 |
| N | -1.446445 | -0.674501 | 0.000585  |
| C | -2.504895 | -0.091863 | 0.000209  |
| O | -3.593846 | 0.346429  | -0.000554 |

#### Anilide anion

|   |           |           |           |
|---|-----------|-----------|-----------|
| C | 0.235081  | -1.227917 | 0.000466  |
| C | 1.047535  | -0.045010 | 0.000114  |
| C | 0.310024  | 1.187787  | 0.000474  |
| C | -1.079759 | 1.222697  | -0.000024 |
| C | -1.843267 | 0.046622  | -0.000396 |

|   |           |           |           |
|---|-----------|-----------|-----------|
| C | -1.152950 | -1.175206 | -0.000068 |
| H | 0.738359  | -2.198370 | 0.000943  |
| H | 0.871023  | 2.126890  | 0.001080  |
| H | -1.583447 | 2.192975  | 0.000023  |
| H | -2.932722 | 0.080138  | -0.000899 |
| H | -1.716144 | -2.112109 | 0.000075  |
| N | 2.392750  | -0.136380 | -0.000541 |
| H | 2.773687  | 0.811298  | -0.000833 |

#### Aniline

|   |          |          |          |
|---|----------|----------|----------|
| C | -1.17008 | 1.20292  | 0.00360  |
| C | 0.22327  | 1.20835  | -0.00465 |
| C | 0.93819  | -0.00010 | -0.01006 |
| C | 0.22324  | -1.20839 | -0.00463 |
| C | -1.17023 | -1.20281 | 0.00367  |
| C | -1.88034 | 0.00003  | 0.00671  |
| H | -1.70673 | 2.15268  | 0.00963  |
| H | 0.76923  | 2.15324  | -0.00664 |
| H | 0.76893  | -2.15342 | -0.00651 |
| H | -1.70693 | -2.15255 | 0.00971  |
| H | -2.97014 | 0.00004  | 0.01368  |
| N | 2.33270  | 0.00007  | -0.08094 |
| H | 2.76632  | -0.83761 | 0.28870  |
| H | 2.76616  | 0.83716  | 0.29019  |

#### 4a

|   |          |          |          |
|---|----------|----------|----------|
| C | -2.04802 | -1.27113 | -0.27608 |
| C | -0.69260 | -0.98718 | -0.43418 |
| C | -0.19326 | 0.31261  | -0.22035 |
| C | -1.11173 | 1.31163  | 0.14813  |
| C | -2.46732 | 1.02437  | 0.30799  |
| C | -2.94735 | -0.26982 | 0.09916  |
| H | -2.40660 | -2.28626 | -0.45414 |
| H | -0.00766 | -1.77716 | -0.74306 |
| H | -0.74808 | 2.32800  | 0.30727  |
| H | -3.15378 | 1.82137  | 0.59803  |
| H | -4.00721 | -0.49438 | 0.22054  |
| N | 1.14417  | 0.66354  | -0.44689 |
| C | 2.08568  | -0.06233 | 0.11532  |
| O | 3.37791  | 0.29931  | -0.24579 |
| O | 2.02907  | -1.00078 | 0.95037  |
| H | 3.30585  | 1.02658  | -0.87693 |

**4b**

|   |          |          |          |
|---|----------|----------|----------|
| C | 2.02142  | 1.32009  | -0.05728 |
| C | 0.65499  | 1.03543  | -0.08808 |
| C | 0.21507  | -0.29657 | -0.03631 |
| C | 1.17818  | -1.32030 | 0.04015  |
| C | 2.53615  | -1.02191 | 0.06721  |
| C | 2.97303  | 0.30453  | 0.02094  |
| H | 2.34068  | 2.36233  | -0.09916 |
| H | -0.06709 | 1.84215  | -0.15413 |
| H | 0.84772  | -2.35974 | 0.07814  |
| H | 3.25969  | -1.83577 | 0.12727  |
| H | 4.03686  | 0.53976  | 0.04345  |
| N | -1.12563 | -0.69021 | -0.08000 |
| C | -2.30493 | 0.05895  | 0.01766  |
| O | -3.37385 | -0.62286 | -0.04927 |
| O | -2.23869 | 1.30903  | 0.16193  |
| H | -1.28152 | -1.68795 | -0.12254 |

**5a**

|   |          |          |          |
|---|----------|----------|----------|
| C | 2.08190  | 1.31045  | -0.03900 |
| C | 0.71158  | 1.04398  | -0.06674 |
| C | 0.27031  | -0.28282 | -0.03077 |
| C | 1.20661  | -1.32464 | 0.02583  |
| C | 2.56838  | -1.04316 | 0.05022  |
| C | 3.01672  | 0.27901  | 0.02011  |
| H | 2.41577  | 2.34790  | -0.06617 |
| H | 0.00123  | 1.86203  | -0.11724 |
| H | 0.85982  | -2.35860 | 0.05116  |
| H | 3.28287  | -1.86519 | 0.09469  |
| H | 4.08339  | 0.50052  | 0.04110  |
| N | -1.08899 | -0.66554 | -0.06160 |
| C | -2.18683 | 0.12849  | 0.01616  |
| O | -3.37436 | -0.51743 | -0.01358 |
| O | -2.18829 | 1.34826  | 0.10800  |
| H | -1.24956 | -1.66534 | -0.09765 |
| H | -3.28143 | -1.47717 | -0.08499 |

**5b**

|   |          |          |          |
|---|----------|----------|----------|
| C | -2.20606 | 1.20946  | -0.11530 |
| C | -0.87284 | 1.21533  | 0.29164  |
| C | -0.22832 | -0.00001 | 0.48986  |
| C | -0.87272 | -1.21538 | 0.29140  |
| C | -2.20593 | -1.20957 | -0.11555 |
| C | -2.87186 | -0.00006 | -0.31972 |
| H | -2.72498 | 2.15452  | -0.27191 |

|   |          |          |          |
|---|----------|----------|----------|
| H | -0.33993 | 2.15221  | 0.45385  |
| H | -0.33971 | -2.15224 | 0.45343  |
| H | -2.72477 | -2.15463 | -0.27235 |
| H | -3.91415 | -0.00008 | -0.63750 |
| N | 1.16965  | -0.00000 | 0.88064  |
| C | 2.24942  | 0.00006  | -0.30381 |
| O | 3.38730  | -0.00028 | 0.15817  |
| O | 1.75361  | 0.00044  | -1.42185 |
| H | 1.38935  | -0.81973 | 1.45411  |
| H | 1.38929  | 0.81969  | 1.45420  |

**Se<sub>2</sub>dianion**

|    |          |          |          |
|----|----------|----------|----------|
| Se | 0.000000 | 0.000000 | 0.000000 |
|----|----------|----------|----------|

**Ground states structures of salenocarbate tautomers****3a**

|    |           |           |           |
|----|-----------|-----------|-----------|
| C  | 1.121662  | 0.504674  | -0.036884 |
| O  | 0.916706  | 1.720390  | -0.141648 |
| Se | 2.878223  | -0.263707 | 0.015612  |
| N  | 0.099095  | -0.403496 | 0.049422  |
| H  | 0.391396  | -1.370774 | 0.092916  |
| C  | -1.293314 | -0.195505 | 0.024650  |
| C  | -2.095598 | -1.346779 | -0.039345 |
| C  | -1.906687 | 1.063396  | 0.076774  |
| C  | -3.481902 | -1.242471 | -0.054457 |
| H  | -1.620539 | -2.328222 | -0.077039 |
| C  | -3.300272 | 1.152173  | 0.058742  |
| H  | -1.305993 | 1.964622  | 0.132746  |
| C  | -4.097023 | 0.010944  | -0.007334 |
| H  | -4.085332 | -2.149074 | -0.104791 |
| H  | -3.764152 | 2.138163  | 0.100213  |
| H  | -5.183482 | 0.094073  | -0.020505 |

**3b**

|    |           |           |           |
|----|-----------|-----------|-----------|
| C  | 1.453743  | 1.030876  | 0.025394  |
| O  | 2.572282  | 1.603817  | 0.048342  |
| Se | 1.702713  | -0.969958 | -0.030035 |
| N  | 0.282645  | 1.583342  | 0.028698  |
| C  | -0.907656 | 0.843773  | 0.018092  |
| C  | -1.509673 | 0.435658  | 1.218994  |
| C  | -1.553958 | 0.543589  | -1.191285 |
| C  | -2.711206 | -0.271682 | 1.207729  |
| H  | -1.019116 | 0.672087  | 2.163849  |
| C  | -2.755827 | -0.163668 | -1.198872 |

|   |           |           |           |
|---|-----------|-----------|-----------|
| H | -1.098291 | 0.863655  | -2.128937 |
| C | -3.340727 | -0.578184 | -0.000538 |
| H | -3.158829 | -0.586394 | 2.151392  |
| H | -3.238371 | -0.393939 | -2.149704 |
| H | -4.280000 | -1.131242 | -0.007913 |
| H | 0.297424  | -1.401691 | -0.072194 |

### 3c

|    |           |           |           |
|----|-----------|-----------|-----------|
| C  | -1.378644 | 0.873480  | 0.000084  |
| O  | -2.481455 | 1.686694  | 0.000196  |
| Se | -1.730540 | -0.998740 | -0.000105 |
| N  | -0.259915 | 1.495332  | 0.000144  |
| C  | 0.949427  | 0.777371  | 0.000075  |
| C  | 1.579166  | 0.448415  | -1.207675 |
| C  | 1.578979  | 0.447827  | 1.207764  |
| C  | 2.807198  | -0.212447 | -1.204952 |
| H  | 1.096232  | 0.711577  | -2.149203 |
| C  | 2.807011  | -0.213033 | 1.204909  |
| H  | 1.095898  | 0.710529  | 2.149344  |
| C  | 3.428224  | -0.547312 | -0.000055 |
| H  | 3.282938  | -0.465799 | -2.153178 |
| H  | 3.282603  | -0.466848 | 2.153085  |
| H  | 4.389146  | -1.061841 | -0.000106 |
| H  | -3.265579 | 1.122872  | 0.000135  |

### 3a·H (NH<sub>2</sub>)

|    |          |          |          |
|----|----------|----------|----------|
| C  | 1.10342  | 0.00029  | -0.43925 |
| O  | 0.56736  | 0.00072  | -1.51842 |
| Se | 2.87376  | -0.00012 | 0.07714  |
| N  | 0.11096  | 0.00005  | 0.78888  |
| H  | 0.35419  | -0.81929 | 1.35578  |
| C  | -1.30581 | -0.00003 | 0.45385  |
| C  | -1.95484 | -1.21678 | 0.28370  |
| C  | -1.95505 | 1.21666  | 0.28412  |
| C  | -3.30503 | -1.21033 | -0.06226 |
| H  | -1.41372 | -2.15269 | 0.42156  |
| C  | -3.30525 | 1.21010  | -0.06185 |
| H  | -1.41411 | 2.15263  | 0.42231  |
| C  | -3.97864 | -0.00015 | -0.23476 |
| H  | -3.83089 | -2.15495 | -0.19571 |
| H  | -3.83127 | 2.15467  | -0.19496 |
| H  | -5.03453 | -0.00020 | -0.50387 |
| H  | 0.35403  | 0.81932  | 1.35593  |

### 3a·H (SeH)

|   |          |         |         |
|---|----------|---------|---------|
| C | -1.05993 | 0.51406 | 0.01937 |
|---|----------|---------|---------|

|    |          |          |          |
|----|----------|----------|----------|
| O  | -0.91227 | 1.72470  | 0.09903  |
| Se | -2.83275 | -0.30099 | -0.00695 |
| N  | -0.06718 | -0.40324 | -0.05594 |
| H  | -0.35124 | -1.37532 | -0.09884 |
| C  | 1.33135  | -0.19490 | -0.02878 |
| C  | 2.12908  | -1.34654 | 0.02485  |
| C  | 1.93422  | 1.06714  | -0.06327 |
| C  | 3.51510  | -1.23798 | 0.04757  |
| H  | 1.65517  | -2.32873 | 0.04881  |
| C  | 3.32727  | 1.15936  | -0.03783 |
| H  | 1.33171  | 1.96790  | -0.11091 |
| C  | 4.12468  | 0.01815  | 0.01813  |
| H  | 4.12132  | -2.14280 | 0.08968  |
| H  | 3.78938  | 2.14632  | -0.06453 |
| H  | 5.21075  | 0.10395  | 0.03745  |
| H  | -3.48586 | 1.01177  | 0.05371  |

### Transition states structures

#### TS1

Imaginary frequency: -253.99 cm<sup>-1</sup>

|    |           |           |           |
|----|-----------|-----------|-----------|
| C  | -2.133579 | 0.642670  | 0.007095  |
| O  | -2.757294 | 1.624120  | 0.021119  |
| Se | -1.680152 | -1.032795 | -0.142013 |
| N  | 0.040034  | 1.833819  | 0.560721  |
| H  | -0.156984 | 2.392147  | -0.271872 |
| C  | 1.091040  | 1.026221  | 0.287247  |
| C  | 1.753232  | 0.956281  | -0.979003 |
| C  | 1.583675  | 0.127877  | 1.283566  |
| C  | 2.812398  | 0.085474  | -1.211751 |
| H  | 1.409856  | 1.614016  | -1.782140 |
| C  | 2.642364  | -0.739575 | 1.036986  |
| H  | 1.107765  | 0.135540  | 2.266989  |
| C  | 3.278970  | -0.777260 | -0.210724 |
| H  | 3.284907  | 0.075977  | -2.196969 |
| H  | 2.980635  | -1.403456 | 1.836186  |
| H  | 4.108493  | -1.459003 | -0.398247 |

#### TS1'

Imaginary frequency: -275.70 cm<sup>-1</sup>

|    |           |           |           |
|----|-----------|-----------|-----------|
| C  | 1.402901  | 1.461480  | 0.169552  |
| O  | 2.538591  | 1.818659  | 0.266044  |
| Se | 1.592616  | -1.118150 | -0.188516 |
| N  | 0.192328  | 1.754018  | 0.126313  |
| C  | -0.931034 | 0.916457  | 0.097382  |
| C  | -1.280787 | 0.149623  | 1.215204  |
| C  | -1.740707 | 0.891610  | -1.043076 |



|   |           |           |           |
|---|-----------|-----------|-----------|
| C | -2.420167 | -0.653068 | 1.178765  |
| H | -0.655143 | 0.186045  | 2.106342  |
| C | -2.878960 | 0.087320  | -1.071222 |
| H | -1.468604 | 1.498818  | -1.905990 |
| C | -3.222381 | -0.689178 | 0.037069  |
| H | -2.682844 | -1.251869 | 2.051124  |
| H | -3.500678 | 0.067900  | -1.966602 |
| H | -4.113264 | -1.316588 | 0.012378  |
| H | 3.043379  | -0.980054 | -0.402286 |

### TS2

Imaginary frequency: -243.42 cm<sup>-1</sup>

|    |           |           |           |
|----|-----------|-----------|-----------|
| C  | 1.402901  | 1.461480  | 0.169552  |
| O  | 2.538591  | 1.818659  | 0.266044  |
| Se | 1.592616  | -1.118150 | -0.188516 |
| N  | 0.192328  | 1.754018  | 0.126313  |
| C  | -0.931034 | 0.916457  | 0.097382  |
| C  | -1.280787 | 0.149623  | 1.215204  |
| C  | -1.740707 | 0.891610  | -1.043076 |
| C  | -2.420167 | -0.653068 | 1.178765  |
| H  | -0.655143 | 0.186045  | 2.106342  |
| C  | -2.878960 | 0.087320  | -1.071222 |
| H  | -1.468604 | 1.498818  | -1.905990 |
| C  | -3.222381 | -0.689178 | 0.037069  |
| H  | -2.682844 | -1.251869 | 2.051124  |
| H  | -3.500678 | 0.067900  | -1.966602 |
| H  | -4.113264 | -1.316588 | 0.012378  |
| H  | 3.043379  | -0.980054 | -0.402286 |

### TS 3c

Imaginary frequency: -315.87 cm<sup>-1</sup>

|    |          |          |          |
|----|----------|----------|----------|
| C  | 1.14418  | -0.20972 | -0.03588 |
| O  | 0.71355  | 1.67186  | 1.23685  |
| Se | 2.91422  | -0.15983 | -0.13669 |
| N  | 0.05279  | -0.67599 | -0.22552 |
| C  | -1.30844 | -0.37933 | -0.16357 |
| C  | -1.78689 | 0.82234  | -0.69759 |
| C  | -2.18289 | -1.30951 | 0.40286  |
| C  | -3.15151 | 1.09572  | -0.64073 |
| H  | -1.09093 | 1.52625  | -1.15073 |
| C  | -3.54470 | -1.01944 | 0.45866  |
| H  | -1.79194 | -2.24490 | 0.80079  |
| C  | -4.03252 | 0.18049  | -0.06133 |
| H  | -3.52775 | 2.03098  | -1.05475 |
| H  | -4.22805 | -1.73923 | 0.90873  |
| H  | -5.09893 | 0.40079  | -0.01904 |

|   |          |         |         |
|---|----------|---------|---------|
| H | -0.24714 | 1.73413 | 1.27194 |
|---|----------|---------|---------|

### TS 3a·H (NH<sub>2</sub>)

Imaginary frequency: -304.30 cm<sup>-1</sup>

|    |          |          |          |
|----|----------|----------|----------|
| C  | -1.28409 | 0.00028  | 0.62609  |
| O  | -0.55669 | 0.00067  | 1.54128  |
| Se | -2.92323 | -0.00007 | -0.05975 |
| N  | 0.02044  | -0.00027 | -1.02462 |
| H  | -0.24951 | -0.83405 | -1.53936 |
| C  | 1.36814  | -0.00018 | -0.60745 |
| C  | 2.01884  | -1.21153 | -0.35563 |
| C  | 2.01886  | 1.21129  | -0.35626 |
| C  | 3.32486  | -1.20640 | 0.13037  |
| H  | 1.50063  | -2.15225 | -0.54494 |
| C  | 3.32488  | 1.20641  | 0.12974  |
| H  | 1.50065  | 2.15192  | -0.54605 |
| C  | 3.98379  | 0.00006  | 0.37494  |
| H  | 3.83056  | -2.15346 | 0.31961  |
| H  | 3.83059  | 2.15355  | 0.31849  |
| H  | 5.00505  | 0.00016  | 0.75507  |
| H  | -0.24947 | 0.83320  | -1.53987 |

### TS3

Imaginary frequency: -223.06 cm<sup>-1</sup>

|   |           |           |           |
|---|-----------|-----------|-----------|
| C | 2.433530  | 0.875254  | 0.520216  |
| C | 1.112665  | 1.296550  | 0.369040  |
| C | 0.182333  | 0.459125  | -0.251698 |
| C | 0.583212  | -0.789562 | -0.742081 |
| C | 1.905022  | -1.201338 | -0.587155 |
| C | 2.835292  | -0.373502 | 0.045018  |
| H | 3.152407  | 1.531265  | 1.011465  |
| H | 0.795237  | 2.272200  | 0.735773  |
| H | -0.143894 | -1.429408 | -1.240628 |
| H | 2.210199  | -2.176165 | -0.968058 |
| H | 3.868709  | -0.699175 | 0.162270  |
| N | -1.129387 | 0.923769  | -0.428970 |
| C | -2.225844 | 0.395545  | -0.273850 |
| O | -3.393640 | 0.242785  | -0.357155 |
| O | -1.860057 | -1.310344 | 1.289894  |
| H | -0.904632 | -1.397062 | 1.363121  |

### TS3'

Imaginary frequency: -277.83 cm<sup>-1</sup>

|   |           |           |          |
|---|-----------|-----------|----------|
| C | -2.553782 | -1.158879 | 0.047830 |
| C | -1.170720 | -1.331417 | 0.058868 |
| C | -0.326514 | -0.218123 | 0.004913 |

|   |           |           |           |
|---|-----------|-----------|-----------|
| C | -0.875818 | 1.068381  | -0.063761 |
| C | -2.260219 | 1.230728  | -0.076508 |
| C | -3.105605 | 0.121353  | -0.020275 |
| H | -3.203466 | -2.033276 | 0.091662  |
| H | -0.735461 | -2.329016 | 0.110259  |
| H | -0.227225 | 1.943480  | -0.109973 |
| H | -2.679473 | 2.235561  | -0.132014 |
| H | -4.187208 | 0.254325  | -0.030665 |
| N | 1.069698  | -0.463714 | 0.011931  |
| C | 1.915633  | 0.432913  | 0.057980  |
| O | 2.515007  | 1.443255  | 0.128013  |
| O | 3.794479  | -0.933447 | -0.114204 |
| H | 3.331215  | -1.773275 | -0.177532 |

#### TS4

Imaginary frequency:  $-114.79 \text{ cm}^{-1}$

|   |           |           |           |
|---|-----------|-----------|-----------|
| C | 2.104621  | 1.252844  | -0.220894 |
| C | 0.867073  | 0.906861  | -0.750452 |
| C | 0.314295  | -0.406324 | -0.601564 |
| C | 1.130629  | -1.326319 | 0.136007  |
| C | 2.367702  | -0.965190 | 0.657848  |
| C | 2.881856  | 0.328449  | 0.492066  |
| H | 2.476758  | 2.269871  | -0.368222 |
| H | 0.288231  | 1.650562  | -1.303399 |
| H | 0.760093  | -2.344483 | 0.284921  |
| H | 2.947154  | -1.710173 | 1.209123  |
| H | 3.852423  | 0.606259  | 0.903044  |
| N | -0.896104 | -0.701326 | -1.124371 |
| C | -2.711754 | 0.305473  | 0.396322  |
| O | -2.140220 | 1.288004  | 0.664785  |
| O | -3.443391 | -0.595757 | 0.259387  |
| H | -1.109575 | -1.675501 | -0.904237 |

#### TS4'

Imaginary frequency:  $-191.67 \text{ cm}^{-1}$

|   |          |           |           |
|---|----------|-----------|-----------|
| C | 2.248310 | -1.088771 | 0.774268  |
| C | 0.950916 | -0.977344 | 0.285006  |
| C | 0.553786 | 0.111138  | -0.545639 |
| C | 1.567175 | 1.070378  | -0.840356 |
| C | 2.861463 | 0.944931  | -0.345900 |
| C | 3.226316 | -0.133604 | 0.469673  |
| H | 2.504710 | -1.941410 | 1.407177  |
| H | 0.209425 | -1.738037 | 0.537041  |
| H | 1.310646 | 1.922785  | -1.474666 |
| H | 3.602964 | 1.705351  | -0.601578 |
| H | 4.241505 | -0.227047 | 0.855314  |

|   |           |           |           |
|---|-----------|-----------|-----------|
| N | -0.727459 | 0.193690  | -0.993611 |
| C | -2.302667 | 0.767492  | 0.764416  |
| O | -1.763131 | 0.248912  | 1.665600  |
| O | -3.044671 | 1.357829  | 0.074970  |
| H | -1.672048 | -1.139241 | -1.039620 |
| O | -2.260507 | -1.972634 | -1.041188 |
| H | -2.354439 | -2.193107 | -0.108955 |
| H | -0.835867 | 1.016706  | -1.583316 |

#### TS5

Imaginary frequency:  $-316.81 \text{ cm}^{-1}$

|   |           |           |           |
|---|-----------|-----------|-----------|
| C | -2.226862 | -1.199514 | 0.196353  |
| C | -0.928169 | -1.222062 | -0.309375 |
| C | -0.277019 | -0.020903 | -0.598479 |
| C | -0.919042 | 1.198588  | -0.372366 |
| C | -2.217720 | 1.212058  | 0.133700  |
| C | -2.877137 | 0.015375  | 0.420478  |
| H | -2.733207 | -2.139480 | 0.416681  |
| H | -0.416667 | -2.169618 | -0.482648 |
| H | -0.400499 | 2.132041  | -0.594081 |
| H | -2.716914 | 2.165953  | 0.304987  |
| H | -3.892281 | 0.029503  | 0.816458  |
| N | 1.069477  | -0.037200 | -1.043490 |
| C | 2.439652  | 0.015362  | 0.453620  |
| O | 3.470128  | -0.015666 | -0.139012 |
| O | 1.792703  | 0.060601  | 1.447588  |
| H | 1.304943  | 0.772944  | -1.612233 |
| H | 1.303421  | -0.883849 | -1.556922 |

## Mass Spectra

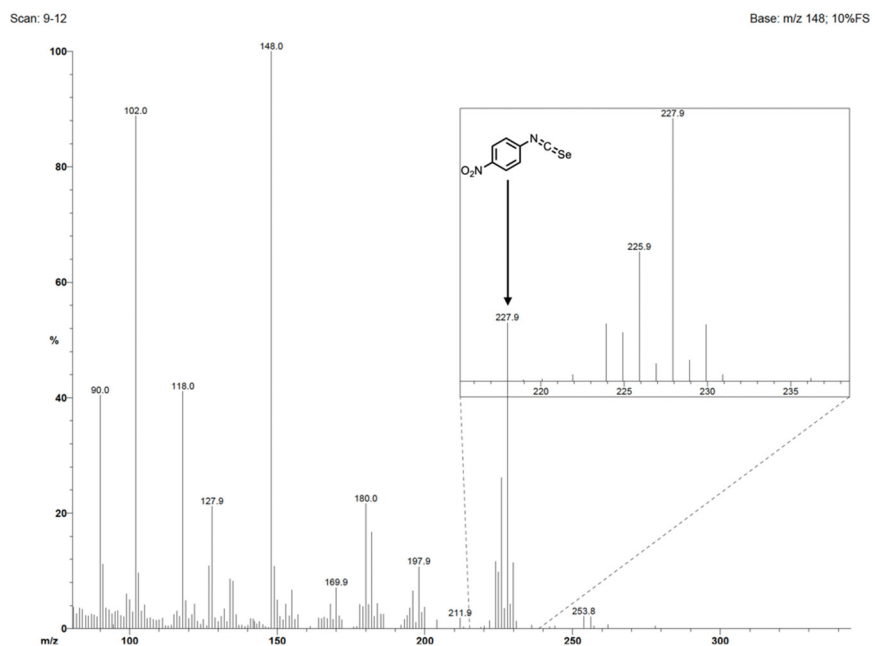

**Figure S26.** Mass spectrum (EI-MS) of 4-nitroformanilide. Actual mass: m/z 227.9438 ( $[\text{C}_7\text{H}_4\text{N}_2\text{O}_2\text{Se}]^-$ ), calculated 227.9434.

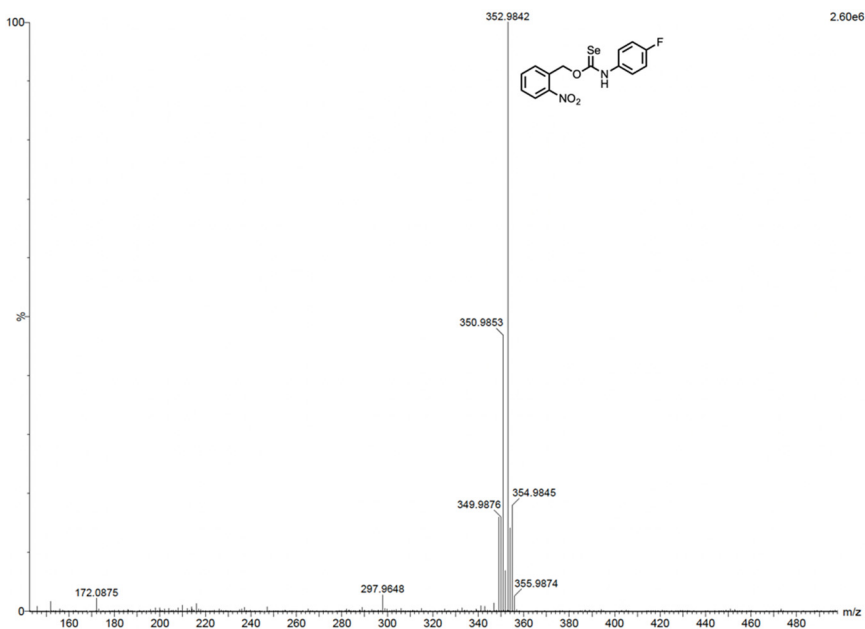

**Figure S27.** Mass spectrum (ESI-MS) of PhotoSeCM. Actual mass: m/z 352.9842 ( $[\text{C}_{14}\text{H}_{10}\text{FN}_2\text{O}_3\text{Se}]^-$ ), calculated 352.9841.

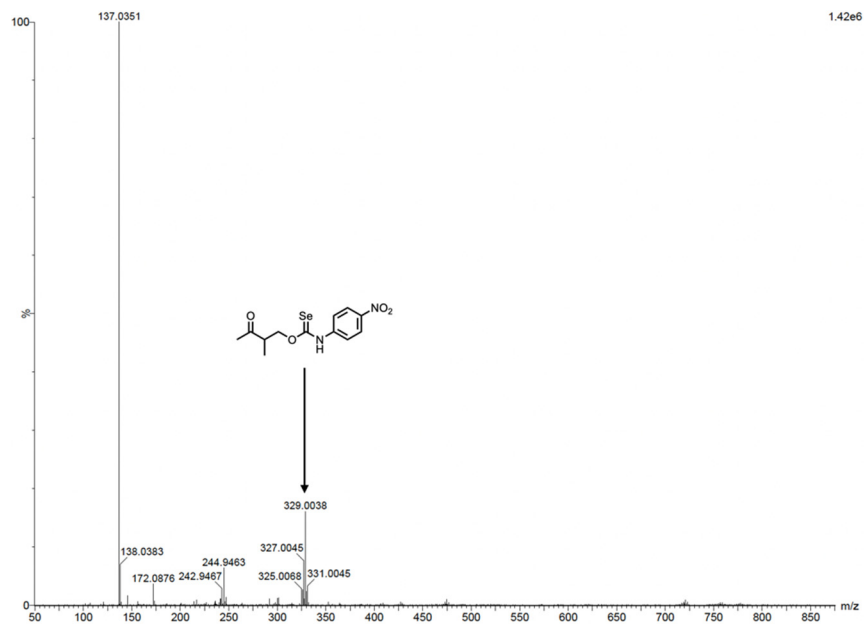

**Figure S28.** Mass spectrum (ESI-MS) of PNA-MeGKSeCM. Actual mass: m/z 329.0038 ( $[\text{C}_{12}\text{H}_{13}\text{N}_2\text{O}_4\text{Se}]^-$ ), calculated 329.0041.

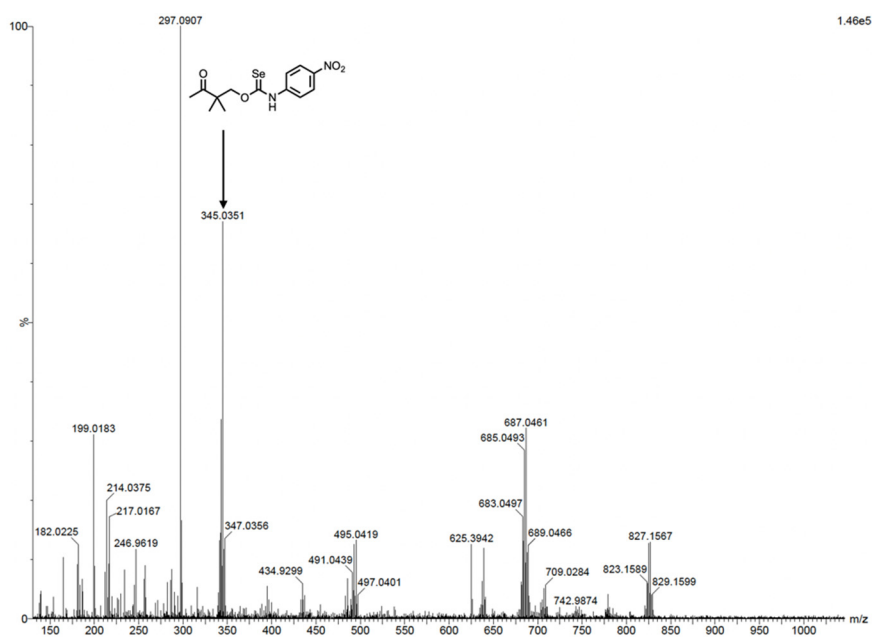

**Figure S29.** Mass spectrum (ESI-MS) of PNA-Me<sub>2</sub>GKSeCM. Actual mass: m/z 345.0351 ( $[\text{C}_{13}\text{H}_{16}\text{N}_2\text{O}_4\text{Se}]^+$ ), calculated 345.0354.

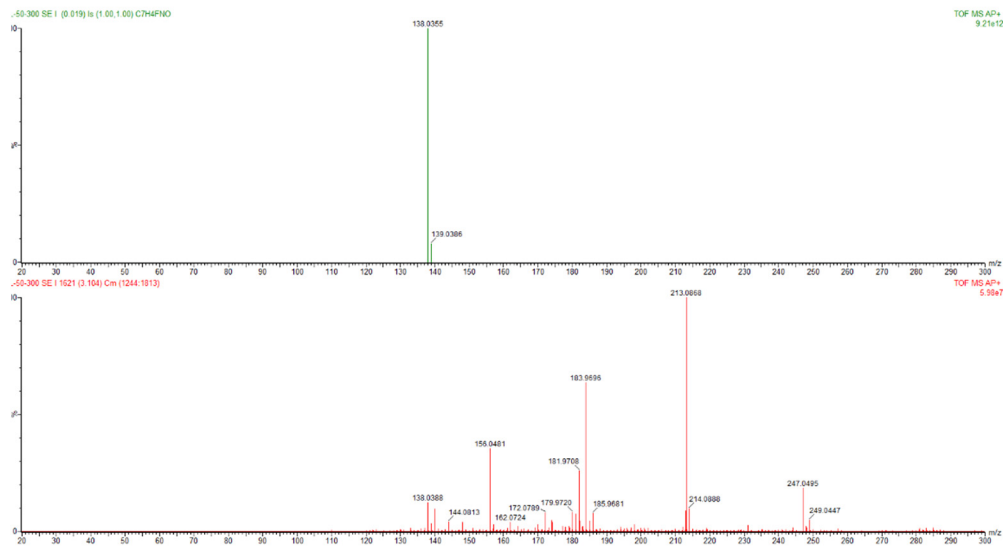

**Figure S30.** Mass spectrum (API-MS) of the crude product mixture after irradiation products of PhotoSeCM showing *p*-fluoroisocyanate formation. Actual mass of *p*-fluoroisocyanate (bottom) : m/z 138.0388 ( $[C_7H_5FNO]^+$ ), calculated mass (top) 138.0355.

## References

1. Gaussian 16, Revision C.01, M. J. Frisch, G. W. Trucks, H. B. Schlegel, G. E. Scuseria, M. A. Robb, J. R. Cheeseman, G. Scalmani, V. Barone, G. A. Petersson, H. Nakatsuji, X. Li, M. Caricato, A. V. Marenich, J. Bloino, B. G. Janesko, R. Gomperts, B. Mennucci, H. P. Hratchian, J. V. Ortiz, A. F. Izmaylov, J. L. Sonnenberg, D. Williams-Young, F. Ding, F. Lipparini, F. Egidi, J. Goings, B. Peng, A. Petrone, T. Henderson, D. Ranasinghe, V. G. Zakrzewski, J. Gao, N. Rega, G. Zheng, W. Liang, M. Hada, M. Ehara, K. Toyota, R. Fukuda, J. Hasegawa, M. Ishida, T. Nakajima, Y. Honda, O. Kitao, H. Nakai, T. Vreven, K. Throssell, J. A. Montgomery, Jr., J. E. Peralta, F. Ogliaro, M. J. Bearpark, J. J. Heyd, E. N. Brothers, K. N. Kudin, V. N. Staroverov, T. A. Keith, R. Kobayashi, J. Normand, K. Raghavachari, A. P. Rendell, J. C. Burant, S. S. Iyengar, J. Tomasi, M. Cossi, J. M. Millam, M. Klene, C. Adamo, R. Cammi, J. W. Ochterski, R. L. Martin, K. Morokuma, O. Farkas, J. B. Foresman, and D. J. Fox, Gaussian, Inc., Wallingford CT, 2019.
2. Chai, J.-D.; Head-Gordon, M., Long-range corrected hybrid density functionals with damped atom–atom dispersion corrections. *Phys. Chem. Chem. Phys.* **2008**, *10* (44), 6615-6620.
3. Dunning Jr, T. H.; Peterson, K. A.; Wilson, A. K., Gaussian basis sets for use in correlated molecular calculations. X. The atoms aluminum through argon revisited. *The Journal of Chemical Physics* **2001**, *114* (21), 9244-9253.
4. Marenich, A. V.; Cramer, C. J.; Truhlar, D. G., Universal solvation model based on solute electron density and on a continuum model of the solvent defined by the bulk dielectric constant and atomic surface tensions. *The Journal of Physical Chemistry B* **2009**, *113* (18), 6378-6396.
5. Bootsma, A. N.; Wheeler, S., Popular integration grids can result in large errors in DFT-computed free energies. **2019**.
6. Funes-Ardoiz, I.; Paton, R. S., GoodVibes version 2.0. 3. *O O NH4++ formation of heterocycles containing CN bonds O O NH3+-H* **2018**.
7. Grimme, S., Supramolecular binding thermodynamics by dispersion-corrected density functional theory. *Chemistry–A European Journal* **2012**, *18* (32), 9955-9964.
8. Legault, C., CYLview, 1.0 b. Université de Sherbrooke 2009
9. Watt, S. K. I.; Charlebois, J. G.; Rowley, C. N.; Keillor, J. W., A mechanistic study of thiol addition to N-acryloylpiperidine. *Org. Biomol. Chem.* **2023**, *21* (10), 2204-2212.

10. Humeres, E.; Sun Lee, B.; Debacher, N. A., Mechanisms of Acid Decomposition of Dithiocarbamates. 5. Piperidyl Dithiocarbamate and Analogues. *J. Org. Chem.* **2008**, *73* (18), 7189-7196.
